# Supplementary material for: A rhizobium-induced FT-FD module locally activates nodule stem cell gene
Source: Research Square preprint supplement (doi:10.21203/rs.3.rs-5006581/v1), 2025-03-18
Supplement: Supplementary file 1 [file 156caa46ce5dbbe637345647.xlsx]

## Sheet: Sheet1
Gene name	Gene identity
GmFT1a	Glyma.16G044200,
GmFT1b	Glyma.19G108100
GmFT2a	Glyma.16G150700
GmFT5a	Glyma.16G044100
GmFT5b	Glyma.19G108200
GmFDL9	Glyma.04G022100
GmFDL16	Glyma.10G071700
GmFDL23	Glyma.05G079800
GmFDL20	Glyma.15G049000
GmCLV3-1	Glyma.12G187800
GmWUS1	Glyma.01G166800
GmWOX5	Glyma.02G254800
GmAP1.2	Glyma.08G269800
GmAP1.3	Glyma.02G121600
GmNINa	Glyma.04G000600
GmNINb	Glyma.02G311000
GmNSP1a	Glyma.16G008200
GmERN1	Glyma.19G113100
GmENOD40	Glyma.01G028500
GmNFYA-C	Glyma.10G082800
ErnA	Brad3257_7701
