# Supplementary material for: A rhizobium-induced FT-FD module locally activates nodule stem cell gene
Source: Research Square preprint supplement (doi:10.21203/rs.3.rs-5006581/v1), 2025-03-18
Supplement: Supplementary file 2 [file 4fb4b19eea6d6895d14d8b28.xlsx]

## Sheet: Sheet1
Mutant	Sequencing data
	WT	Target 1	Target 2
Gmfd23-1	ATGGGATCTCAAGGTGGGGCAGTGCAAGAGCCAAAGACTACTACTACTACCACTACCCCTTTTGTTAGGCAAGGGCCCTTGTATAATCTGACCCTTGATGAGGTGCATAACCAGCTTGGGAATTTGGGGAAGCCACTTGGCAGCATGAATCTTGATGAGTTGCTGAAGAGTGTGTGGAGTGCTGAAGCTAGTGGTGGTGAGGCCTCTGGCTTGGACTTTGGTGTTGGTGGTGGTGATGCTAACATGCAGCATGGTGAGGCTGCTGCTTTCGGCTCCTCTCTGAATCCTCATGTGAGCCTAACTTTGTCTAGGGATCTTAGCAGGAAAACTGTTCATGAGGTTTGGAGAGATATGCAACTGAAGAAGGTCACTAATAGGGATAAGAAAATCCAGGAAAGG…	GACTTACCTTTACGTCTTCTAAGCCTTTCTTCTCCTCTTCTAATCGTGAAACTTTAATCTCCAGTTCTTGTGTGTATGCCTGTCCATTGACATAGATAAGACCTTGTATCAAATTAAAAAAAAACAAATAGATTTCAAAGAAATAACACCACACACTCACACACAAATGTATATAACCTGTCTTCTTGCCCGTGACCGAGCAGCAGATTCCCTATTTTTAATCATCCTCTTCTGCCTCCTCTCCACAGCATGTGAGCATCACCACCACCAACACCAAAGTCCAAGCCACAGGCCTCACCACCACTAGCTTCAGCACTCCACACACTCTTCAGCAACTCATCAAGATACATGCTGCCAAGTGGGTTCCCCAAATTCCCAAGCTGGGTATGCGCCTCATCT…	GACTTACCTTTACGTCTTCTAAGCCTTTCTTCTCCTCTTCTAATCGTGAAACTTTAATCTCCAGTTCTTGTGTGTATGCCTGTCCATTGACATAGATAAGACCTTGTATCAAATTAAAAAAAAACAAATAGATTTCAAAGAAATAACACCACACACTCACACACAAATGTATATAACCTGTCTTCTTGCCCGTGACCGAGCAGCAGATTCCCTATTTTTAATCATCCTCTTCTGCCTCCTCTCCACAGCATGTGAGCATCACCACCACCAACACCAAAGTCCAAGCCACAGGCCTCACCACCACTAGCTTCAGCACTCCACACACTCTTCAGCAACTCATCAAGATACATGCTGCCAAGTGGGTTCCCCAAATTCCCAAGCTGGGTATGCGCCTCATCT…
Gmfd23-2		TTTCTTTTGTGCTTTCTATTTGGAGGGGGGGTACTAAAATGAATTTGAGGTGCTTTCTGAGGAGCTTTGGAGATGTATGATATAAAATTGTAAGTTTGTCTTGTTGAGGTTGAGAAGAATGGGATCTCAAGGTGGGGCAGTGCAAGAGCCAAAGACTACTACTACTACCACTACCCCTTTTGTTAGGCAAGGGCCCTTGTATAATCTGACCCTTGATGAGGTGCATAACCAGCTTGGGAATTTGGGGAAGCCACTTGGCAGCATGAATCTTGATGAGTTGCTGAAGAGTGTGTGGAGTGCTGAAGCTAGTGGTGGTGAGGCCTCTGGCTTGGACTTTGGTGTTGGTGGTGGTGATGCTAACATGCAGCATGGTGAGGCTGCTGCTTTCGGCTCCTCTCT…	GTCTTCTAGCCCTTTCATTCTCCTCTTCTAATCGTGAAACTTTAATCTCCAGTTCTTGTGTGTATGCCTGTCCATTGACATAGATAAGACCTTGTATCAAATTAAAAAAAAACAAATAGATTTCAAAGAAATAACACCACACACTCACACACAAATGTATATAACCTGTCTTCTTGCCCGTGACCGAGCAGCAGATTCCCTATTTTTAATCATCCTCTTCTGCCTCCTCTCCACAGTTCTCCCCCCCAAAACCAAAAACACCCCTTTTTCAACCCAAAGTTTGTGTATAAAACAACGCACCCTTTAAAAAAACGGGGGTCTCAAAGAATGCGGCATCCAAAACAAAATTCACTCCACCCTGGAAAGGCGGTGGAAGGGCATGGCCGGCCACATAACCCC…
Gmfd23-3		TAAAATCAAACTTTGTTTTCTTTTTGTGCTTTCATATTTGGAGGGGGGGTACTAAAATGAATTTGAGGTGCTTTCTGAGGAGCTTTGGAGATGTATGATATAAAATTGTAAGTTTGTCTTGTTGAGGTTGAGAAGAATGGGATCTCAAGGTGGGGCAGTGCAAGAGCCAAAGACTACTACTACTACCACTACCCCTTTTGTTAGGCAAGGGCCCTTGTATAATCTGACCCTTGATGAGGTGCATAACCAGCTTGGGAATTTGGGGAAGCCACTTGGCAGCATGAATCTTGATGAGTTGCTGAAGAGTGTGTGGAGTGCTGAAGCTAGTGGTGGTGAGGCCTCTGGCTTGGACTTTGGTGTTGGTGGTGGTGATGCTAACATGCACTGTGGAGAGGAGGC…	TAAAATCAAACTTTGTTTTCTTTTTGTGCTTTCATATTTGGAGGGGGGGTACTAAAATGAATTTGAGGTGCTTTCTGAGGAGCTTTGGAGATGTATGATATAAAATTGTAAGTTTGTCTTGTTGAGGTTGAGAAGAATGGGATCTCAAGGTGGGGCAGTGCAAGAGCCAAAGACTACTACTACTACCACTACCCCTTTTGTTAGGCAAGGGCCCTTGTATAATCTGACCCTTGATGAGGTGCATAACCAGCTTGGGAATTTGGGGAAGCCACTTGGCAGCATGAATCTTGATGAGTTGCTGAAGAGTGTGTGGAGTGCTGAAGCTAGTGGTGGTGAGGCCTCTGGCTTGGACTTTGGTGTTGGTGGTGGTGATGCTAACATGCACTGTGGAGAGGAGGC…
Gmfd23-4		CTTTTGTGCTTTCTATTTGGAGGGGGGGTACTAAAATGAATTTGAGGTGCTTTCTGAGGAGCTTTGGAGATGTATGATATAAAATTGTAAGTTTGTCTTGTTGAGGTTGAGAAGAATGGGATCTCAAGGTGGGGCAGTGCAAGAGCCAAAGACTACTACTACTACCACTACCCCTTTTGTTAGGCAAGGGCCCTTGTATAATCTGACCCTTGATGAGGTGCATAACCAGCTTGGGAATTTGGGGAAGCCACTTGGCAGCATGAATCTTGATGAGTTGCTGAAGAGTGTGTGGAGTGCTGAAGCTAGTGGTGGTGAGGCCTCTGGCTTGGACTTTGGTGTTGGTGGTGGTGATGCTAACATGCAGCATGGTGAGGCTGCTGCTTTCGGCTCCTCTCTGAA…	TCAGTCTTCTAGCCTTTCATTCTCCTCTTCTAATCGTGAAACTTTAATCTCCAGTTCTTGTGTGTATGCCTGTCCATTGACATAGATAAGACCTTGTATCAAATTAAAAAAAAACAAATAGATTTCAAAGAAATAACACCACACACTCACACACAAATGTATATAACCTGTCTTCTTGCCCGTGACCGAGCAGCAGATTCCCTATTTTTAATCATCCTCTTCTGCCTCCTCTCCACAGTTTTCTCCCCCACAATACCAGAAACCCCCCTTTTTCCACCCAAAGTTTGTGTATCAAAAAACGCACCCTTTAAAAAAGCCGGTGTCTCAGAATATGCTGCATCCAAAACCAGATTCACTCCAACCTGGAAAGGCTGCTGAATGGCATGGCCTGCCACATAA…
Gmfd23-5		CTTTTGTGCTTTCTATTTGGAGGGGGGGTACTAAAATGAATTTGAGGTGCTTTCTGAGGAGCTTTGGAGATGTATGATATAAAATTGTAAGTTTGTCTTGTTGAGGTTGAGAAGAATGGGATCTCAAGGTGGGGCAGTGCAAGAGCCAAAGACTACTACTACTACCACTACCCCTTTTGTTAGGCAAGGGCCCTTGTATAATCTGACCCTTGATGAGGTGCATAACCAGCTTGGGAATTTGGGGAAGCCACTTGGCAGCATGAATCTTGATGAGTTGCTGAAGAGTGTGTGGAGTGCTGAAGCTAGTGGTGGTGAGGCCTCTGGCTTGGACTTTGGTGTTGGTGGTGGTGATGCTAACATGCAGCATGGTGAGGCTGCTGCTTTCGGCTCCTCTCTGAA…	TCAGTCTTCTAGCCTTTCATTCTCCTCTTCTAATCGTGAAACTTTAATCTCCAGTTCTTGTGTGTATGCCTGTCCATTGACATAGATAAGACCTTGTATCAAATTAAAAAAAAACAAATAGATTTCAAAGAAATAACACCACACACTCACACACAAATGTATATAACCTGTCTTCTTGCCCGTGACCGAGCAGCAGATTCCCTATTTTTAATCATCCTCTTCTGCCTCCTCTCCACAGTTTTCTCCCCCACAATACCAGAAACCCCCCTTTTTCCACCCAAAGTTTGTGTATCAAAAAACGCACCCTTTAAAAAAGCCGGTGTCTCAGAATATGCTGCATCCAAAACCAGATTCACTCCAACCTGGAAAGGCTGCTGAATGGCATGGCCTGCCACATAA…
Gmfd23-6		CCGGGAAAAAAACTTTGTTTCTTTTTGTGCTTTCATATTTGGAGGGGGGGTACTAAAATGAATTTGAGGTGCTTTCTGAGGAGCTTTGGAGATGTATGATATAAAATTGTAAGTTTGTCTTGTTGAGGTTGAGAAGAATGGGATCTCAAGGTGGGGCAGTGCAAGAGCCAAAGACTACTACTACTACCACTACCCCTTTTGTTAGGCAAGGGCCCTTGTATAATCTGACCCTTGATGAGGTGCATAACCAGCTTGGGAATTTGGGGAAGCCACTTGGCAGCATGAATCTTGATGAGTTGCTGAAGAGTGTGTGGAGTGCTGAAGCTAGTGGTGGTGAGGCCTCTGGCTTGGACTTTGGTGTTGGTGGTGGTGATGCTAACATGCACTGTGGAGAGGAGG…	TCTTAATTAAGTCTTCTAAGCCTTTCATTCTCCTCTTCTAATCGTGAAACTTTAATCTCCAGTTCTTGTGTGTATGCCTGTCCATTGACATAGATAAGACCTTGTATCAAATTAAAAAAAAACAAATAGATTTCAAAGAAATAACACCACACACTCACACACAAATGTATATAACCTGTCTTCTTGCCCGTGACCGAGCAGCAGATTCCCTATTTTTAATCATCCTCTTCTGCCTCCTCTCCACAGTGCATGTTAGCATCACCACCACCAACACCAAAGTCCAAGCCAGAGGCCTCACCACCACTAGCTTCAGCACTCCACACACTCTTCAGCAACTCATCAAGATTCATGCTGCCAAGTGGCTTCCCCAAATTCCCAAGCTGGTTATGCACCTCATCA…
Gmfd23-7		TCTTAATTAAGTCTTCTAAGCCTTTCATTCTCCTCTTCTAATCGTGAAACTTTAATCTCCAGTTCTTGTGTGTATGCCTGTCCATTGACATAGATAAGACCTTGTATCAAATTAAAAAAAAACAAATAGATTTCAAAGAAATAACACCACACACTCACACACAAATGTATATAACCTGTCTTCTTGCCCGTGACCGAGCAGCAGATTCCCTATTTTTAATCATCCTCTTCTGCCTCCTCTCCACAGTGCATGTTAGCATCACCACCACCAACACCAAAGTCCAAGCCAGAGGCCTCACCACCACTAGCTTCAGCACTCCACACACTCTTCAGCAACTCATCAAGATTCATGCTGCCAAGTGGCTTCCCCAAATTCCCAAGCTGGTTATGCACCTCATCA…	CTTTCATTCTCCTCTTCTAATCGTGAAACTTTAATCTCCAGTTCTTGTGTGTATGCCTGTCCATTGACATAGATAAGACCTTGTATCAAATTAAAAAAAAACAAATAGATTTCAAAGAAATAACACCACACACTCACACACAAATGTATATAACCTGTCTTCTTGCCCGTGACCGAGCAGCAGATTCCCTATTTTTAATCATCCTCTTCTGCCTCCTCTCCACTTCTCCACCACAATACCAGAGACACCCCTTTTTCGACCCAGAGTTTGTGTATCAGACAACGCACCCTTTAAAGAAGCCGGTGTCTCAGAGTATGCTGCATCCAAAACCAGATTCACTCCAACCTGGAAAGGCTGCTGAATGGCATGGCCTGCCACATAACCCCCCATCACATTCGG…
Gmfd23-8		TTTTTGTGCTTTCATATTTGGAGGGGGGGTACTAAAATGAATTTGAGGTGCTTTCTGAGGAGCTTTGGAGATGTATGATATAAAATTGTAAGTTTGTCTTGTTGAGGTTGAGAAGAATGGGATCTCAAGGTGGGGCAGTGCAAGAGCCAAAGACTACTACTACTACCACTACCCCTTTTGTTAGGCAAGGGCCCTTGTATAATCTGACCCTTGATGAGGTGCATAACCAGCTTGGGAATTTGGGGAAGCCACTTGGCAGCATGAATCTTGATGAGTTGCTGAAGAGTGTGTGGAGTGCTGAAGCTAGTGGTGGTGAGGCCTCTGGCTTGGACTTTGGTGTTGGTGGTGGTGATGCTAACATGCAAGCATGGTGAGGCTGCTGCTTTCGGCTCCTCTCTG…		TCAGTCTTCTAGCCTTTCATTCTCCTCTTCTAATCGTGAAACTTTAATCTCCAGTTCTTGTGTGTATGCCTGTCCATTGACATAGATAAGACCTTGTATCAAATTAAAAAAAAACAAATAGATTTCAAAGAAATAACACCACACACTCACACACAAATGTATATAACCTGTCTTCTTGCCCGTGACCGAGCAGCAGATTCCCTATTTTTAATCATCCTCTTCTGCCTCCTCTCCACAGCCACCACAATACCAGAGACACCCCTTTTTCGACCCAGAGTTTGTGTATCAGACAACGCACCCTTTAAAGAAACCGGTGTCTCAGAGTATGCTGCATCCAAAACCAGATTCACTCCAACCTGGAAAGGCTGCTGAATGGCATGGCCTGCCACATAACCCCCC…
Gmfd23-9		TGTTCTTTTGTGCTTTCATATTTGGAGGGGGGGTACTAAAATGAATTTGAGGTGCTTTCTGAGGAGCTTTGGAGATGTATGATATAAAATTGTAAGTTTGTCTTGTTGAGGTTGAGAAGAATGGGATCTCAAGGTGGGGCAGTGCAAGAGCCAAAGACTACTACTACTACCACTACCCCTTTTGTTAGGCAAGGGCCCTTGTATAATCTGACCCTTGATGAGGTGCATAACCAGCTTGGGAATTTGGGGAAGCCACTTGGCAGCATGAATCTTGATGAGTTGCTGAAGAGTGTGTGGAGTGCTGAAGCTAGTGGTGGTGAGGCCTCTGGCTTGGACTTTGGTGTTGGTGGTGGTGATGCTAACATCATGGTGAGGCTGCTGCTTTCGGCTCCTCTCTGA…	CTAGCCTTTCATTCTCCTCTTCTAATCGTGAAACTTTAATCTCCAGTTCTTGTGTGTATGCCTGTCCATTGACATAGATAAGACCTTGTATCAAATTAAAAAAAAACAAATAGATTTCAAAGAAATAACACCACACACTCACACACAAATGTATATAACCTGTCTTCTTGCCCGTGACCGAGCAGCAGATTCCCTATTTTTAATCATCCTCTTCTGCCTCCTCTCCACAGTTTCCCCCCCAAAACACCAGACACCCCCCTTTTTACCCCCAGATTTTGTGTCTCACAAAACACCCCCTTTAAAAAACGGGGTGTCTCAGAATGTGGCGTACAAAAAAAAATATTCTCCCAACTGGAAAAGGGGGGGAAAGGGGTGGGCCGCCCCATAAACCCCCCCCTC…
Gmfd23-10		TTTCTATTTGGAGGGGGGGTACTAAAATGAATTTGAGGTGCTTTCTGAGGAGCTTTGGAGATGTATGATATAAAATTGTAAGTTTGTCTTGTTGAGGTTGAGAAGAATGGGATCTCAAGGTGGGGCAGTGCAAGAGCCAAAGACTACTACTACTACCACTACCCCTTTTGTTAGGCAAGGGCCCTTGTATAATCTGACCCTTGATGAGGTGCATAACCAGCTTGGGAATTTGGGGAAGCCACTTGGCAGCATGAATCTTGATGAGTTGCTGAAGAGTGTGTGGAGTGCTGAAGCTAGTGGTGGTGAGGCCTCTGGCTTGGACTTTGGTGTTGGTGGTGGTGATGCTAACAGCATGGTGAGGCTGCTGCTTTCGGCTCCTCTCTGAATCCTCATGTGAGC…	TCATTCTCCTCTTCTAATCGTGAAACTTTAATCTCCAGTTCTTGTGTGTATGCCTGTCCATTGACATAGATAAGACCTTGTATCAAATTAAAAAAAAACAAATAGATTTCAAAGAAATAACACCACACACTCACACACAAATGTATATAACCTGTCTTCTTGCCCGTGACCGAGCAGCAGATTCCCTATTTTTAATCATCCTCTTCTGCCTCCTCTCCACTTCTCCACCACAATACCAGAGACACCCCTTTTTCGACCCAGAGTTTGTGTATCAGACAACGCACCCTTTAAAGAAGCCGGTGTCTCAGAGTATGCTGCATCCAAAACCAGATTCACTCCAACCTGGAAAGGCTGCTGAATGGCATGGCCTGCCACATAACCCCCCATCACATTCGGCTG…
Gmwus1-1	ATGATGGAACCTCAACAACAACAACAACAAGCACAAGGGAGCCAACAACAACAACAAAACGAGGATGGTGGCAGTGGAAAAGGGGGGTTTCTGAGCAGGCAAAGTAGTACACGGTGGACTCCAACAAACGACCAGATAAGAATATTGAAGGAACTTTACTACAACAATGGAATTAGATCCCCGAGTGCAGAGCAGATTCAGAGGATCTCTGCTAGGCTGAGGCAGTACGGTAAGATTGAAGGCAAGAATGTCTTTTATTGGTTCCAGAACCACAAAGCTCGAGAAAGGCAGAAGAAAAGGTTCACTTCTGATCATAATCATAATAATGTCCCCATGCAAAGACCCCCAACTAATCCTTCTGCTGCTTGGAAACCTGATCTAGCTGATCCCATTCACACC…	ACCAGCTTTTTTGTCGCAGGAACCGCAGGGCTCGAGAACGCAACACGAAAGGATCGCTTCTGGTCTAATCAGAATACGTGTCCCCTTGTAAACACCCCCAACTACTCCGTCTGCTGCTTGGAAACCTGATCTAACTGATCCCATTCACACCACCAAGTATTGGAACATCTCTTCTACTGCAGGTAGGTTAACCAAACCAACCATATACTTATTTACCTCTCTCACTTCTTATCTCTCAAGTTATTTTCTTAACTTTGCTCCTTTTAGGATAAGTAAATTAAATATGTCTTATTCTTATATTGTGGCCATGTTTGTGTATGTAGGGATCTCTTCGGCATCATCTTCTGTTGAGATGGTTACTGTGGGACAGATGGGGAATTATGGGTATGGTTCTGTGCC…	CCACACTGATTATATAAAACCATAACTGACTAAACACACAGAGTCTAATATATAAACTACAATTAATCATAGGATGATAACCAAATTATGCAAGGCTATCATTATCATCTTATAATTAATAAGTTGAGTATATATATGATATATCTTAAGCATAATCTGGAGACCTGCGAGTGTAGGAGTTGAGACTGAGCTCCAAGGAAGCACGAGAAGCATTCTTGAACCCTTCTTCAGTATGATACCAGCCGTTTCCATCATAGTTATACGAATTAGACTTGAGGTTGCAATAGCCATGGATGTCCTCACCGTGCATAGGGAATAAAGGGAGGGTTTCAATCTTAGTAGCACCAATGTTCTCTGCTTCTTCTTCAAGGGTTTCTTGATCACTTGGCCTTATTTTGT…
Gmwus1-2		TTTCTTTTGTGCTTTCTATTTGGAGGGGGGGTACTAAAATGAATTTGAGGTGCTTTCTGAGGAGCTTTGGAGATGTATGATATAAAATTGTAAGTTTGTCTTGTTGAGGTTGAGAAGAATGGGATCTCAAGGTGGGGCAGTGCAAGAGCCAAAGACTACTACTACTACCACTACCCCTTTTGTTAGGCAAGGGCCCTTGTATAATCTGACCCTTGATGAGGTGCATAACCAGCTTGGGAATTTGGGGAAGCCACTTGGCAGCATGAATCTTGATGAGTTGCTGAAGAGTGTGTGGAGTGCTGAAGCTAGTGGTGGTGAGGCCTCTGGCTTGGACTTTGGTGTTGGTGGTGGTGATGCTAACATGCAGCATGGTGAGGCTGCTGCTTTCGGCTCCTCTCT…	TTTGCCACACTGATTATATAAAACCATAACTGACTAAACACACAGAGTCTAATATATAAACTACAATTAATCATAGGATGATAACCAAATTATGCAAGGCTATCATTATCATCTTATAATTAATAAGTTGAGTATATATATGATATATCTTAAGCATAATCTGGAGACCTGCGAGTGTAGGAGTTGAGACTGAGCTCCAAGGAAGCACGAGAAGCATTCTTGAACCCTTCTTCAGTATGATACCAGCCGTGGTGGTGTGAATGGGATCAGCTAGATCAGGTTTCCAAGCAGCAGAAGGATTAGTTGGGGGTCTTTGCATGGGGACATTATTATGATTATGATCAGAAGTGAACCTTTTCTTCTGCCTTTCTCGAGCTTTGTGGTTCTGGAACCAATAAA…
Gmwus1-3		CTTTTATTGGTTCAGAACCACAAAGCTCGAGAAAGGCAGAAGAAAAGGTTCACTTCTGATCATAATCATAATAATGTCCCCATGCAAAGACCCCCAACTAATCCTTCTGCTGCTTGGAAACCTGATCTAGCTGATCCCATTCACACCACCAAGGCTGGTATCATACTGAAAAAGGGTTCAAAAATGCTTCTCGTGCTTCCTTGGAGCTCAGTCTCAACTCCTACACTCGCAGGTCTCCAGATTATGCTTAAGATATATCATATATATACTCAACTTATTAATTATAAGATGATAATGATAGCCTTGCATAATTTGGTTATCATCCTATGATTAATTGTAGTTTATATATTAAACTCTGTGTGTTTAGTCAGTTATGGTTTTATATAATCAGTGTGGGCA…	CTTCCGTTACTGATGCCGCACTGATTATATATAACCATACCTGACTAAACACACAGAGTCTAATATATAAACTACAATTATTCATAGGATGATAACCAAATTATGCAAGGCTATCATTATCATCTTATAATTAATAAGTTGAGTATATATATGATATATCTTAAGCATAATCTGGAGACCTGCGAGTGTAGGAGTTGAGACTGAGCTCCAAGGAAACACGAGAAGCATTCTTGAACCCTTCTTCAGTATGATACCAGCCTTGGTGGGGTGAATGGGATCAGCTAGATCAGGTTTCCAAGCAGCAGAAGGATTAGTTGGGGGTCTTTGCATGGGGACATTATTATGATTATGATCAAAAGTGAACCTTTTCTTCTGCCTTTCTCGAGCTTTGTGGTTCTG…
Gmwus1-4		GCCTACATGTCTTTTATTGGTTCAGACCACAAAGCTCGAGAAAGGCAGAAGAAAAGGTTCACTTCTGATCATAATCATAATAATGTCCCCATGCAAAGACCCCCAACTAATCCTTCTGCTGCTTGGAAACCTGATCTAGCTGATCCCATTCACACCACCAGTATTGTAACATCTCTTCTACTGCGGGTAGGTTAACCAAACCAACCATATACTTATTTACCTCTCTCACTTCTTATCTCTCAAGTTATTTTCTTAACTTTGCTCCTTTTAGGATAAGTAAATTAAATATGTCTTATTCTTATATTGTGGCCATGTTTGTGTATGTAGGGATCTCTTCGGCATCATCTTCTGTTGAGATGGTTACTGTGGGACAGATGGGGAATTATGGGTATGGTTCTG…	GGGTCTGGTTACTTTGCCACACTGATTATATAAAACCATAACTGACTAAACACACAGAGTCTAATATATAAACTACAATTAATCATAGGATGATAACCAAATTATGCAAGGCTATCATTATCATCTTATAATTAATAAGTTGAGTATATATATGATATATCTTAAGCATAATCTGGAGACCTGCGAGTGTAGGAGTTGAGACTGAGCTCCAAGGAAGCACGAGAAGCATTCTTGAACCCTTCTTCAGTATGATACCAGCCTTCCATCATAGTTATACGAATAAGACTTGAGGTTGCAATAGCCATGGATGTCCTCACCGTGCATAGGGAATAATGGGAGGGTTTCAATCTTAGTAGCACCAATGTTCTCTGCTTCTTCTTCATGGGTGTCTTGATCACT…
Gmwus1-5		AGTAGCGATGTCTTTTATTGGTTCAGACCACAAAGCTCGAGAAAGGCAGAAGAAAAGGTTCACTTCTGATCATAATCATAATAATGTCCCCATGCAAAGACCCCCAACTAATCCTTCTGCTGCTTGGAAACCTGATCTAGCTGATCCCATTCACACCACCAGTATTGTAACATCTCTTCTACTGCAGGTAGGTTAACCAAACCAACCATATACTTATTTACCTCTCTCACTTCTTATCTCTCAAGTTATTTTCTTAACTTTGCTCCTTTTAGGATAAGTAAATTAAATATGTCTTATTCTTATATTGTGGCCATGTTTGTGTATGTAGGGATCTCTTCGGCATCATCTTCTGTTGAGATGGTTACTGTGGGACAGATGGGGAATTATGGGTATGGTTCT…	AGTAGCGATGTCTTTTATTGGTTCAGACCACAAAGCTCGAGAAAGGCAGAAGAAAAGGTTCACTTCTGATCATAATCATAATAATGTCCCCATGCAAAGACCCCCAACTAATCCTTCTGCTGCTTGGAAACCTGATCTAGCTGATCCCATTCACACCACCAGTATTGTAACATCTCTTCTACTGCAGGTAGGTTAACCAAACCAACCATATACTTATTTACCTCTCTCACTTCTTATCTCTCAAGTTATTTTCTTAACTTTGCTCCTTTTAGGATAAGTAAATTAAATATGTCTTATTCTTATATTGTGGCCATGTTTGTGTATGTAGGGATCTCTTCGGCATCATCTTCTGTTGAGATGGTTACTGTGGGACAGATGGGGAATTATGGGTATGGTTCT…
Gmwus1-6		AGATGAGGGCGATGTCTTTTATTGGTTCAGAACCACAAAGCTCGAGAAAGGCAGAAGAAAAGGTTCACTTCTGATCATAATCATAATAATGTCCCCATGCAAAGACCCCCAACTAATCCTTCTGCTGCTTGGAAACCTGATCTAGCTGATCCCATTCACACCACCACGGCTGGTATCATACTGAAAAAGGGTTCAAAAATGCTTCTCGGGCTTCCTTGAAGCTCAGTCTCAACTCCTACACTCGCAGGTCTCCAAATTATGCTTAAAAAATATCATATATATACTCAACTTATTAATTATAAAATGATAATGATAGCCTTGCATAATTTGGTTATCATCCTATGATTAATTGTATTTTATATATTAAACTCTGTGTGTTTATTCAGTTATGGTTTTATA…	ACTATCCATTACTTTGCCACACTGATTATATAAAACCATAACTGACTAAACACACAGAGTCTAATATATAAACTACAATTAATCATAGGATGATAACCAAATTATGCAAGGCTATCATTATCATCTTATAATTAATAAGTTGAGTATATATATGATATATCTTAAGCATAATCTGGAGACCTGCGAGTGTAGGAGTTGAGACTGAGCTCCAAGGAAGCACGAGAAGCATTCTTGAACCCTTCTTCAGTATGATACCAGCCTGGGGGGTGTGAATGGGATCAGCTAAATCAGGTTTCCAAGCAGCAAAAGGATTAGTTGGGGGTCTTTGCATGGGGACATTATTATGATTATGATCAAAAGTGAACCTTTTCTTCTGCCTTTCTCGAGCTTTGGGGTTCT…
Gmwus1-7		AACAGAAGATGTCTTTTATTGGTTCAGAACCACAAAGCTCGAGAAAGGCAGAAGAAAAGGTTCACTTCTGATCATAATCATAATAATGTCCCCATGCAAAGACCCCCAACTAATCCTTCTGCTGCTTGGAAACCTGATCTAGCTGATCCCATTCACACCACCGGGGGGGGTAATACTGAAGAAAGGGGCTAGAAAGCTTCTCGTGCTTCTTCGTAGATCTCTCTCTCCTCCTCCACTCTCAGGGGTCCCCATAATGCTCATAATATATCTTATATATACTCTCCTTATAAATAATAAGATAATAATGATAACCCCGTGTAAAATGGTGATCATCCTCTGATAATTAGTGGATTTTATATAATACACTGTGTGTGTATACTCATATGTTGTTATATAATC…	TTATCCGATCCATTACTTTGCCCACACTGATTATATAAAACCATAACTGACTAAACACACAGAGTCTAATATATAAACTACAATTAATCATAGGATGATAACCAAATTATGCAAGGCTATCATTATCATCTTATAATTAATAAGTTGAGTATATATATGATATATCTTAAGCATAATCTGGAGACCTGCGAGTGTAGGAGTTGAGACTGAGCTCCAAGGAAGCACGAGAAGCATTCTTGAACCCTTCTTCAGTATGATACCAGCCGGGGGGGTGAGAGTGAGAACCTATATAACGTGTCCCCGAAGAAGAAAGAGAATTTGGGGGGCTCTTTGTGTGGACATTATTATGATAATGATAACAAAAGAGCCTCTTCTTCTGCCTCTTTCGAGATTTGTGGG…
Gmwus1-8		GGCTCAGGAGATGTCTTTTATTGGTTCAGAACCACAAAGCTCGAGAAAGGCAGAAGAAAAGGTTCACTTCTGATCATAATCATAATAATGTCCCCATGCAAAGACCCCCAACTAATCCTTCTGCTGCTTGGAAACCTGATCTAGCTGATCCCATTCACACCACCAAGTATGGAACCTTTTCTTCTACGGCAGGAAGGTAAACCAACCCAACCTAATACTTATTTCCCCTTCCCCTTTCTTATCCCTCAAGTTTTTTTCTTACTTTTGCCCCTTTTAGAATAATAAAATTAATTTTGTTTTATTCTTTTTTGGTGGCCTGGTTGGGGTTGGTAGGAATCTCTTCGGCATCTTCTTTGGTTAAAAGGGTTATGGGGGAACAAAGGGGAAATTAGGGGAATG…	TTGCCACACTGATTATATAAAACCATAACTGACTAAACACACAGAGTCTAATATATAAACTACAATTAATCATAGGATGATAACCAAATTATGCAAGGCTATCATTATCATCTTATAATTAATAAGTTGAGTATATATATGATATATCTTAAGCATAATCTGGAGACCTGCGAGTGTAGGAGTTGAGACTGAGCTCCAAGGAAGCACGAGAAGCATTCTTGAACCCTTCTTCAGTATGATACCAGCCCCATCATAGTTATACGAATTAAACTTGAGGTTGCAATAGCCATGGATGTCCTCCCCGTGCGTAGGGAATAAAGGGAGGGTTTCTTTCTTAGTAGCACCAATGTTCTCTGCTTCTTCTTCAAGGGTTTCTTGATCACTTGGCCTTATTTTGTC…
Gmwus1-9		TGAAACGATGTCTTTTATTGGTTCAGACCACAAAGCTCGAGAAAGGCAGAAGAAAAGGTTCACTTCTGATCATAATCATAATAATGTCCCCATGCAAAGACCCCCAACTAATCCTTCTGCTGCTTGGAAACCTGATCTAGCTGATCCCATTCACACCACCAAGTATTGAAACATCTCTTCAACGGCAGGTAGGTTAACCAAACCAACCAAATACTTATTTACCTCTCTCCCTTCTTATCTCTCAAGTTATTTTCTTAACTTTGCTCCTTTTAGGAAAAGTAAATTAATTATGTCTAATTCTTAAATGGGGGCCAGGTTTGGGTTTGTAGGGATCTCTTCGGCTTCATCTTCGGTTGAAATGGTAACGGGGGAACAAATGGGAAATTATGGGAATGGTTC…	CACTGATTATATAAAACCATAACTGACTAAACACACAGAGTCTAATATATAAACTACAATTAATCATAGGATGATAACCAAATTATGCAAGGCTATCATTATCATCTTATAATTAATAAGTTGAGTATATATATGATATATCTTAAGCATAATCTGGAGACCTGCGAGTGTAGGAGTTGAGACTGAGCTCCAAGGAAGCACGAGAAGCATTCTTGAACCCTTCTTCAGTATGATACCAGCCGCATCATAGTTATACGAATTAGACTTGAGGTTGCAATAGCCATGGATGTCCTCACCGTGCATAGGGAATAAAGGGAGGGTTTCAATCTTAGTAGCACCAATGTTCTCTGCTTCTTCTTCAAGGGTTTCTTGATCACTTGGCCTTATTTTGTCAAAGAA…
Gmwus1-10		AGATGAGGCGGATGTCTTTTATTGGTTCAGAACCACAAAGCTCGAGAAAGGCAGAAGAAAAGGTTCACTTCTGATCATAATCATAATAATGTCCCCATGCAAAGACCCCCAACTAATCCTTCTGCTGCTTGGAAACCTGATCTAGCTGATCCCATTCACACCACCACCGCTGGTATCCTTCTGGAAAAAGGTTCCAAAATGGTTCCTCGGCCTCCTTGGAACTCCGTTTCAAATCCCTCCCTCCCAAGGCCCCCAAATTAGCTTTAAAATTATCATAATAATACTCCACTTATTAATTATAAAAAGATTATGAAAACCCTGGCATATTTGGGTAATATCCTATGAATAATTGGTATTTATTTATTAAAATCTGGGTTGTTAATCCATTATGGTTTTATA…	CGTATTCAATTACTTTGCCACACTGATTATATAAAACCATAACTGACTAAACACACAGAGTCTAATATATAAACTACAATTAATCATAGGATGATAACCAAATTATGCAAGGCTATCATTATCATCTTATAATTAATAAGTTGAGTATATATATGATATATCTTAAGCATAATCTGGAGACCTGCGAGTGTAGGAGTTGAGACTGAGCTCCAAGGAAGCACGAGAAGCATTCTTGAACCCTTCTTCAGTATGATACCAGCCGTGGGGGGGGGAATGGGAACCACTAAATCCAGGTTCCCAGACACAAAAAGGATTATTGGGGGGCCTTGGCTGGGGAACTTATTTTGAATAAGATCCGAAGTGAACCCTTTCCTCTGGCTTTCTCCAGCCTTGGGGGTT…
Gmclv3-1/WT-1	ATGGCGTCAAAGTTTATCTTTACCACTGTGGTTTTACTTATGCTTTTGTGCTTGCTTCTGATGAGGGAGCCTTCTGGTTTGTCAATGTTCTTTTTTTCTTGTTATTACCATAGTTATTTGAGTGACAAATATTGGAATATAAGATTGTGTATTGTTTTATTCATATTTTTGTTGCTAGAGTATGTGTTATAGCATTCTTATAATTTTTGTTCACTGGTTGCAGGTTGCGGTTCTGCGTATGAATGCTTTGGTGCTAATGCAGCTGATCTAAGGGACATTCCAAACAGGAAGGTCTGACTCTCTCTCTCTCTCTATATATATATATATATATATATATGTGTGTGTGTGTATGTGTGGGGTTTAAACTTCAAAGGGGTTAATTTCTCTCTCTTTTTTTCA…	ACAGATACACTATAATACGTGTATTACCCTATGATCTTCACCACACAACATTACTTGTTCACCACCTTGCTCTCCTTGCAACTTCCACCCCTACCACCTACCTTGATTCTCTTGAGACTTTTTTTCCAATGGCGTCAAAGTTTATCTTTACCACTGGTGGTACTACTGATGCTGTGGTGGTTGCTGATGATGAAGGATTCTGCTGGGTTGTCGATGTTCTTTTCTTGTTGTTATCATAATAATTATATGGACGACTATTGTAGTAATATAATATGGATTGTTGTTTTATTATTTTTGTTGCTACAATATGATGTGTAATATTCTTATTATAATTGTTCACCGCTGGCTGCATGTTGCGCTGCTGATTATGATGCGGTGCTGCTGCTGCTGATGATCTGG…	GGAaACAGAGATGAAAGGAAGATGAGTGTATGTTTATATTTATGCCATAAGCTGGTAGATGTTCACACTGATAACTAATACTAGGCCAAGAGCACAAAGAAGGTTCCATCGGTGAGTTTAAGGGGTTTGAGGCTTTTTGGGGTTGACACCATTATGATGCAGCGGATCTGGACCAGAAGGAACCTTCCTTAACTCCCAATTCAGTGGCTTTTCACCATACTTGTTGCTTGATGATCCTTGCAGACTAGCCTTCAGAGCACTAGTTTTCTTATCCTTCAAAACAGACAGCACCTGCATATATACACCACAAGATAAAGTTATAGAAATTTACCCCAGAAACTATGTACCAAAAAAGATCTTTCTCACGTTACGATCATACAAAAATCACGTGAAAAAAAG…
Gmclv3-1/WT-2		CTATAATACGTGTATTACCCTATGATCTTCaCCACACAACATTACTTGTTCACCACCTTGCTCTCCTTGCAACTTCCACCCCTACCACCTACCTTGATTCTCTTGAGACTTTTTTTCCAATGGCGTCAAAGTTTATCTTTACCACTGGTTTTACTTATGCTTTTGTGCTTGCTTCTGATGAGGGAGCCTTCTGGTTTGTCAATGTTCTTTTTTTCTTGTTATTACCATAGTTATTTGAGTGACAAATATTGGAATATAAGATTGTGTATTGTTTTATTCATATTTTTGTTGCTAGAGTATGTGTTATAGCATTCTTATAATTTTTGTTCACTGGTTGCAGGTTGCGGTTCTGCGTATGAATGCTTTGGTGCTAATGCAGCTGATCTAAGGGACATTCCA…	AACAGAGAATGAAAAGGAAGATGAGTGTATGTTTATATTTATGCCATAAGCTGGTAGATGTTCACACTGATAACTAATACTAGGCCAAGAGCACAAAGAAGGTTCCATCGGTGAGTTTAAGGGGTTTGAGGCTTTTTGGGGTTGACACCATTATGATGCAGCGGATCTGGACCAGAAGGAACCTTCCTTAACTCCCAATTCAGTGGCTTTTCACCATACTTGTTGCTTGATGATCCTTGCAGACTAGCCTTCAGAGCACTAGTTTTCTTATCCTTCAAAACAGACAGCACCTGCATATATACACCACAAGATAAAGTTATAGAAATTTACCCCAGAAACTATGTACCAAAAAAGATCTTTCTCACGTTACGATCATACAAAAATCACGTGAAAAAAAGA…
Gmclv3-1/WT-3		AACTTTATTACCCTATAAATACGTGTATTACCCTATGATCTTCACCACACAACATTACTTGTTCACCACCTTGCTCTCCTTGCAACTTCCACCCCTACCACCTACCTTGATTCTCTTGAGACTTTTTTTCCAATGGCGTCAAAGTTTATCTTTACCACTGGGTTTTACTTATGCTTTTGTGCTTGCTTCTGATGAGGGAGCCTTCTGGTTTGTCAATGTTCTTTTTTTCTTGTTATTACCATAGTTATTTGAGTGACAAATATTGGAATATAAAATTGTGTATTGTTTTATTCATATTTTTGTTGCTAAAGTATGTGTTATAGCATTCTTATAATTTTTGTTCACTGGTTGCAGGTTGCGGTTCTGCGTATGAATGCTTTGGTGCTAATGCAGCTGATC…	ACAGAGATGAAAGGAAGATGAGTGTATGTTTATATTTATGCCATAAGCTGGTAGATGTTCACACTGATAACTAATACTAGGCCAAGAGCACAAAGAAGGTTCCATCGGTGAGTTTAAGGGGTTTGAGGCTTTTTGGGGTTGACACCATTATGATGCAGCGGATCTGGACCAGAAGGAACCTTCCTTAACTCCCAATTCAGTGGCTTTTCACCATACTTGTTGCTTGATGATCCTTGCAGACTAGCCTTCAGAGCACTAGTTTTCTTATCCTTCAAAACAGACAGCACCTGCATATATACACCACAAGATAAAGTTATAGAAATTTACCCCAGAAACTATGTACCAAAAAAGATCTTTCTCACGTTACGATCATACAAAAATCACGTGAAAAAAAGAGAG…
Gmclv3-1/WT-4		TAAATACGTGTATTACCCTATGATCTTCCCACACAACATTACTTGTTCACCACCTTGCTCTCCTTGCAACTTCCACCCCTACCACCTACCTTGATTCTCTTGAGACTTTTTTTCCAATGGCGTCAAAGTTTATCTTTACCACTGACTTATGCTTTTGTGCTTGCTTCTGATGAGGGAGCCTTCTGGTTTGTCATTGTTCTTTTTTTCTTGTTATTACCATAGTTATTTAGAGTGACAGATATTGGAATATAAGATTGTGTATTGTTTTATTCATATTTTTGTTGCTACAGTATGGGTATAGCATTCTTATAATTTTTGTTCACTGGTTGCAGGTTGCGATTCTGCGTATGAATGCTTTGGTGCTAATGCAGCTGAGCTAGGGGACATTCCAAACAGGAA…	AATACAGAGATGAAAGGAAGATGAGTGTATGTTTATATTTATGCCATAAGCTGGTAGATGTTCACACTGATAACTAATACTAGGCCAAGAGCACAAAGAAGGTTCCATCGGTGAGTTTAAGGGGTTTGAGGCTTTTTGGGGTTGACACCATTATGATGCAGCGGATCTGGACCAGAAGGAACCTTCCTTAACTCCCAATTCAGTGGCTTTTCACCATACTTGTTGCTTGATGATCCTTGCAGACTAGCCTTCAGAGCACTAGTTTTCTTATCCTTCAAAACAGACAGCACCTGCATATATACACCACAAGATAAAGTTATAGAAATTTACCCCAGAAACTATGTACCAAAAAAGATCTTTCTCACGTTACGATCATACAAAAATCACGTGAAAAAAAGA…
Gmclv3-1/WT-5		ATAAATACGTGTATTACCCTATGATCTTCACCACACAACATTACTTGTTCACCACCTTGCTCTCCTTGCAACTTCCACCCCTACCACCTACCTTGATTCTCTTGAGACTTTTTTTCCAATGGCGTCAAAGTTTATCTTAAGCTTTGGAGCTTGATTCTGATGAGGGAGCCTTCTGTCCTTGATCAATGTGCTTTTTTTCTTACTATGTACGATAGATTATTTGATGTGACAATAATTGTCAATATAACTATTGTGTATTATTTTATTAATATATATGATGTTAAAATATGTGTTATAGCATTATTATAATTAATGTTACACTCGGATGCTAGTTGCGGATCTGCATATGACTGCTTTGATGCTAATGCAGCTGATCTAGGGAACATTACAGACAGGAAG…	GGGGGAGGAACAGGTAAACAAGAGATGAAAAGGAAGATGAGTGTATGTTTATATTTATGCCATAAGCTGGTAGATGTTCACACTGATAACTAATACTAGGCCAAGAGCACAAAGAAGGTTCCATCGGTGAGTTTAAGGGGTTTGAGGCTTTTTGGGGTTGACACCATTATGATGCGGCGTATCTGGACCTTAAGGAACCTTCCTTAACTCCCAATTCAGTGGCTTTTCACCATACTTGTTGCTTGATGATCCTTGCAAACTAGCCTTCAGAGCACTAGTTTTCTTATCCTTCAAAACATACAGCACCTGCATATATACACCACAAAATAAAGTTATAGAAATTTACCCCAGAAACTATGTACCAAAAAAGATCTTTCTCACGTTACGATCATACAAAAA…
Gmclv3-1/WT-6		TAATACGTGTATTACCCTATGATCTTCCCACACAACATTACTTGTTCACCACCTTGCTCTCCTTGCAACTTCCACCCCTACCACCTACCTTGATTCTCTTGAGACTTTTTTTCCAATGGCGTCAAAGTTTATCTTTACCACTGGGGTAAATAGTTTCTGGGGTAAATTTCTATAACTTTATCTTGTGGTGTATATATGCAGGTGCTGTCTGTTTTGAAGGATAAGAAAACTAGTGCTCTGAAGGCTAGTCTGCAAGGATCATCAAGCAACAAGTATGGTGAAAAGCCACTGAATTGGGAGTTAAGGAAGGTTCCTTCTGGTCCAGATCCGCTGCATCATAATGGTGTCAACCCCAAAAAGCCTCAAACCCCTTAAACTCACCGATGGAACCTTCTTTGT…	TAATACGTGTATTACCCTATGATCTTCCCACACAACATTACTTGTTCACCACCTTGCTCTCCTTGCAACTTCCACCCCTACCACCTACCTTGATTCTCTTGAGACTTTTTTTCCAATGGCGTCAAAGTTTATCTTTACCACTGGGGTAAATAGTTTCTGGGGTAAATTTCTATAACTTTATCTTGTGGTGTATATATGCAGGTGCTGTCTGTTTTGAAGGATAAGAAAACTAGTGCTCTGAAGGCTAGTCTGCAAGGATCATCAAGCAACAAGTATGGTGAAAAGCCACTGAATTGGGAGTTAAGGAAGGTTCCTTCTGGTCCAGATCCGCTGCATCATAATGGTGTCAACCCCAAAAAGCCTCAAACCCCTTAAACTCACCGATGGAACCTTCTTTGT…
Gmclv3-1/WT-7		ATAATACGTGTATTACCCTATGATCTTCACCACACAACATTACTTGTTCACCACCTTGCTCTCCTTGCAACTTCCACCCCTACCACCTACCTTGATTCTCTTGAGACTTTTTTTCCAATGGCGTCAAAGTTTATCTTTACCACTGGTGTTGCTTCTGCTTTTGTGGTTGCTGCTGATGACGAAGCCTTCTGGTTTGTCGATGTTCTTTTTTTCTTGTTATTACCATAATAATTAGAGGGAAGAGTATTGGAATATAAGAATATGGATTGTTTTATTCTTATTTTTGTTGCTAGAGTATGAGGTATAGTATTCTTATTATTTTTGTGCACCGGTGGGAGGTTGCGGTTCTGCTAATGAAGGCTTTGGTGCTAATGAAGCTGATCAAAGGGACATTCTCAA…	GAACACAGAGATGAAAGGAAGATGAGTGTATGTTTATATTTATGCCATAAGCTGGTAGATGTTCACACTGATAACTAATACTAGGCCAAGAGCACAAAGAAGGTTCCATCGGTGAGTTTAAGGGGTTTGAGGCTTTTTGGGGTTGACACCATTATGATGCAGCGGATCTGGACCAGAAGGAACCTTCCTTAACTCCCAATTCAGTGGCTTTTCACCATACTTGTTGCTTGATGATCCTTGCAGACTAGCCTTCAGAGCACTAGTTTTCTTATCCTTCAAAACAGACAGCACCTGCATATATACACCACAAGATAGAGTTATAGAAATTTACCCCAGAAACTATGTACCAAAAAAGATCTTTCTCACGTTACGATCATACAAAAATCACGTGAAAAAAAG…
Gmclv3-1/WT-8		TCTGTACAACAACTATAAATACGTGTATTACCCTATGATCTTCACCACACAACATTACTTGTTCACCACCTTGCTCTCCTTGCAACTTCCACCCCTACCACCTACCTTGATTCTCTTGAGACTTTTTTTCCAATGGCGTCAAAGTTTATCTTTACCACTGGTTTTACTTTTGGTTTTTTGGTTGCTTCTGATGAAGGGGCCCTCTGGGGTTTCCAAGGTCTTTTTTTTTTGGTATTACCATAATTATTTTAGGGGAAAAAATTGGAAAAATAAAATGGGGATTGTTTTTTTCCTAATTTTTTTGCTAAAAGATTTGGTATAACATTCTTATAATTTTTTTTCACCGGTTGCCGGGTGCGGGTCTTCCGATTAAAGCTTTTGTGCTAATGCCGCTGATCT…	AGAGATGAAAAGGAAGATGAGTGTATGTTTATATTTATGCCATAAGCTGGTAGATGTTCACACTGATAACTAATACTAGGCCAAGAGCACAAAGAAGGTTCCATCGGTGAGTTTAAGGGGTTTGAGGCTTTTTGGGGTTGACACCATTATGATGCAGCGGATCTGGACCAGAAGGAACCTTCCTTAACTCCCAATTCAGTGGCTTTTCACCATACTTGTTGCTTGATGATCCTTGCAGACTAGCCTTCAGAGCACTAGTTTTCTTATCCTTCAAAACAGACAGCACCTGCATATATACACCACAAGATAAAGTTATAGAAATTTACCCCAGAAACTATGTACCAAAAAAGATCTTTCTCACGTTACGATCATACAAAAATCACGTGAAAAAAAGAGAGA…
Gmclv3-1/WT-9		ATAATACGTGTATTACCCTATGATCTTCACCACACAACATTACTTGTTCACCACCTTGCTCTCCTTGCAACTTCCACCCCTACCACCTACCTTGATTCTCTTGAGACTTTTTTTCCAATGGCGTCAAAGTTTATCTTTACCACTGGGTTTTCATTTGCTTTTGTGTGCTCGTTTGAGGAGGGGGACCTCTGGGGTGTCAAAGTGTTTTTTTTTTTGTGATAACCCCATAGATATGAGAGAGAAAAATTGGAAAATAAAAGAGTGTGTTGTTTTATTTATATTTTTGTGGCGAGAGAATGTGTGATAACACTCTTATAAATTTTGTGCTCTGGGTGCGCGGGGCGGGTCTGCGCATAAGAGCGTTTGGGCGCAAGCGCCTGAGATCAAGGACACTTCCCA…	AACAGAGATGAAAAGGAAGATGAGTGTATGTTTATATTTATGCCATAAGCTGGTAGATGTTCACACTGATAACTAATACTAGGCCAAGAGCACAAAGAAGGTTCCATCGGTGAGTTTAAGGGGTTTGAGGCTTTTTGGGGTTGACACCATTATGATGCAGCGGATCTGGACCAGAAGGAACCTTCCTTAACTCCCAATTCAGTGGCTTTTCACCATACTTGTTGCTTGATGATCCTTGCAGACTAGCCTTCAGAGCACTAGTTTTCTTATCCTTCAAAACAGACAGCACCTGCATATATACACCACAAGATAAAGTTATAGAAATTTACCCCAGAAACTATGTACCAAAAAAGATCTTTCTCACGTTACGATCATACAAAAATCACGTGAAAAAAAGAG…
Gmclv3-1/WT-10		TTATACGTTGTATTACCCTATGATCTTCACCACACAACATTACTTGTTCACCACCTTGCTCTCCTTGCAACTTCCACCCCTACCACCTACCTTGATTCTCTTGAGACTTTTTTTCCAATGGCGTCAAAGTTTATCTTTACCACTGTTGGTTTTACTTATGCTTATGAGGTAGCTTCTGATGAGGGAGCCGTCTGTTTTGTCAATGTTCTTTTTTTCTTGTTATTACGATAGATATTGGAGTGACAAATAGTGGAATATAATATTGTGAATTGTTTTATTCAAATTTGTGTTGCTACAGTATGAGATATATCATTCATAGAATTTTTGTTCACTGGCTGCAGGTTACTGCTCTGCGGATAAAGGCTTTGATGCTAATGACACTGATCAAAGGAACGTTCC…	AACAGAGATGAAAGGAAGATGAGTGTATGTTTATATTTATGCCATAAGCTGGTAGATGTTCACACTGATAACTAATACTAGGCCAAGAGCACAAAGAAGGTTCCATCGGTGAGTTTAAGGGGTTTGAGGCTTTTTGGGGTTGACACCATTATGATGCAGCGGATCTGGACCAGAAGGAACCTTCCTTAACTCCCAATTCAGTGGCTTTTCACCATACTTGTTGCTTGATGATCCTTGCAGACTAGCCTTCAGAGCACTAGTTTTCTTATCCTTCAAAACAGACAGCACCTGCATATATACACCACAAGATAAAGTTATAGAAATTTACCCCAGAAACTATGTACCAAAAAAGATCTTTCTCACGTTACGATCATACAAAAATCACGTGAAAAAAAGAGA…
Gmclv3-1/WT-11		CCTATAATACGTGTATTACCCTATGATCTTCACCACACAACATTACTTGTTCACCACCTTGCTCTCCTTGCAACTTCCACCCCTACCACCTACCTTGATTCTCTTGAGACTTTTTTTCCAATGGCGTCAAAGTTTATCTTTACCACTGTGGTTTTACTTATGCTTTTGTGCTTGCTTCTGATGAGGGAGCCTTCTGGTTTGTCAATGTTCTTTTTTTCTTGTTATTACCATAGTTATTTGAGTGACAAATATTGGAATATAAGATTGTGTATTGTTTTATTCATATTTTTGTTGCTAGAGTATGTGTTATAGCATTCTTATAATTTTTGTTCACTGGTTGCAGGTTGCGGTTCTGCGTATGAATGCTTTGGTGCTAATGCAGCTGATCTAAGGGACATT…	AGCAGCAGATGAAAGGGAAGATGAGTGTGATGTTGATATTTGTGCCATAAGCTGGTAGATGTTCACACTGATAACTAATACTAGGCCAAGAGCACAAAGAAGGTTCCATCGGTGAGTTTAAGGGGTTTGAGGCTTTTTGGGGTTGACACCACCATGATGCAGCGGATCTGGACCAGAAGGAACCTTCCTTAACTCCCAATTCAGTGGCTTTTCACCATACTTGTTGCTTGATGATCCTTGCAGACTAGCCTTCAGAGCACTAGTTTTCTTATCCTTCAAAACAGACAGCACCTGCATATATACACCACAAGATAAAGTTATAGAAATTTACCCCAGAAACTATGTACCAAAAAAGATCTTTCTCACGTTACGATCATACAAAAATCACGTGAAAAAAAG…
Gmclv3-1/WT-12		TTATACGTGTATTACCCTATGATCTTCACCACACAACATTACTTGTTCACCACCTTGCTCTCCTTGCAACTTCCACCCCTACCACCTACCTTGATTCTCTTGAGACTTTTTTTCCAATGGCGTCAAAGTTTATCTTTACCACTGGTTTTACTTATGCTTTTGTGCTTGCTTCTGATGAGGGAGCCTTCTGGTTTGTCAATGTTCTTTTTTTCTTGTTATTACCATAGTTATTTGAGTGACAAATATTGGAATATAAGATTGTGTATTGTTTTATTCATATTTTTGTTGCTAGAGTATGTGTTATAGCATTCTTATAATTTTTGTTCACTGGTTGCAGGTTGCGGTTCTGCGTATGAATGCTTTGGTGCTAATGCAGCTGATCTAAGGGACATTCCAAAC…	GGCCCAGTACTCGGTATACAGAGATGAAAAGGAAGATGAGTGTATGTTTATATTTATGCCATAAGCTGGTAGATGTTCACACTGATAACTAATACTAGGCCAAGAGCACAAAGAAGGTTCCATCGGTGAGTTTAAGGGGTTTGAGGCTTTTTGGGGTTGACACCATTATGATGCAGCGGATCTGGACCAGAAGGAACCTTCCTTAACTCCCAATTCAGTGGCTTTTCACCATACTTGTTGCTTGATGATCCTTGCAGACTAGCCTTCAGAGCACTAGTTTTCTTATCCTTCAAAACAGACAGCACCTGCATATATACACCACAAGATAAAGTTATAGAAATTTACCCCAGAAACTATGTACCAAAAAAGATCTTTCTCACGTTACGATCATACAAAAAT…
Gmclv3-1/ft5b-1-1	ATGGCGTCAAAGTTTATCTTTACCACTGTGGTTTTACTTATGCTTTTGTGCTTGCTTCTGATGAGGGAGCCTTCTGGTTTGTCAATGTTCTTTTTTTCTTGTTATTACCATAGTTATTTGAGTGACAAATATTGGAATATAAGATTGTGTATTGTTTTATTCATATTTTTGTTGCTAGAGTATGTGTTATAGCATTCTTATAATTTTTGTTCACTGGTTGCAGGTTGCGGTTCTGCGTATGAATGCTTTGGTGCTAATGCAGCTGATCTAAGGGACATTCCAAACAGGAAGGTCTGACTCTCTCTCTCTCTCTATATATATATATATATATATATATGTGTGTGTGTGTATGTGTGGGGTTTAAACTTCAAAGGGGTTAATTTCTCTCTCTTTTTTTCA…	TGATCACTATAATACGTGTATTACCCTATGATCTTCCCACACAACATTACTTGTTCACCACCTTGCTCTCCTTGCAACTTCCACCCCTACCACCTACCTTGATTCTCTTGAGACTTTTTTTCCAATGGCGTCAAAGTTTATCTTTACCACTGTTTTATGCTTTTGTGCTTGGTTCTGATGAGGGAGGCGGCTGGTTTGTGGATGTTCTTTTTTTCTTGTTATTACCATAGTCATTTGAGTGACGAATATTGGAATATAAGATTGTGTATTGTTTTATTCATATTTTTGTTGCTAGAGTATGTGTTATAGCATTCTTATAATTTTTGTTCTCTGGTTGCAGGTTGCGGTTCTGCGTATGAATGCTTTGGTGCTAATGCAGCTGATCTAAGGGACATTGCA…	GGTAAACAGAGATGAAAAGGAAGATGAGTGTATGTTTATATTTATGCCATAAGCTGGTAGATGTTCACACTGATAACTAATACTAGGCCAAGAGCACAAAGAAGGTTCCATCGGTGAGTTTAAGGGGTTTGAGGCTTTTTGGGGTTGACACCATTATGATGCAGCGGATCTGGACCAGAAGGAACCTTCCTTAACTCCCAATTCAGTGGCTTTTCACCATACTTGTTGCTTGATGATCCTTGCAGACTAGCCTTCAGAGCACTAGTTTTCTTATCCTTCAAAACAGACAGCACCTGCATATATACACCACAAGATAAAGTTATAGAAATTTACCCCAGAAACTATGTACCAAAAAAGATCTTTCTCACGTTACGATCATACAAAAATCACGTGAAAAAA…
Gmclv3-1/ft5b-1-2		CTACATCACCCTATAATACGTGTATTACCCTATGATCTTCACCACACAACATTACTTGTTCACCACCTTGCTCTCCTTGCAACTTCCACCCCTACCACCTACCTTGATTCTCTTGAGACTTTTTTTCCAATGGCGTCAAAGTTTATCTTTACCACTGGGTTTTACTTATGCTTTTGTGCTTGCTTCTGATGAGGGAGCCTTCTGGTTTGTCAATGTTCTTTTTTTCTTGTTATTACCATAGTTATTTGAGTGACAAATATTGGAATATAAGATTGTGTATTGTTTTATTCATATTTTTGTTGCTAGAGTATGTGTTATAGCATTCTTATAATTTTTGTTCACTGGTTGCAGGTTGCGGTTCTGCGTATGAATGCTTTGGTGCTAATGCAGCTGATCTAA…	AATACGTAACACAGATGTATATAAGGCATACGATGAGCGAATGTTTATATCTAGTGCCATACAGCTGCCAGATGTTCACACTTGATATCTACTACCACGCCTAGAGCACAAAGAAGGTTGCATCGCCGAGTTTCAGGGGTCTGAGGTCTTCTGAGGTTTTCCCCCCCATGATGCAGCGGATCTGGACCAGAAGGAACCTTCCTTAACTCCCAATTCAGTGGCTTTTCACCATACTTGTTGCTTGATGATCCTTGCAGACTAGCCTTCAGAGCACTAGTTTTCTTATCCTTCAAAACAGACAGCACCTGCATATATACACCACAAGATAAAGTTATAGAAATTTACCCCAGAAACTATGTACCAAAAAAGATCTTTCTCACGTTACGATCATACAAAAAT…
Gmclv3-1/ft5b-1-3		CGATCTCACTATAATACGTGTATTACCCTATGATCTTCACCACACAACATTACTTGTTCACCACCTTGCTCTCCTTGCAACTTCCACCCCTACCACCTACCTTGATTCTCTTGAGACTTTTTTTCCAATGGCGTCAAAGTTTATCTTTACCACTGGGTTTTACTTATGCTTTTGTGCTTGCTTCTGATGAGGGAGCCTTCTGGTTTGTCAATGTTCTTTTTTTCTTGTTATTACCATAGTTATTTGAGTGACAAATATTGAAATATAAGATTGTGTATTGTTTTATTCATTTTTTTGTTGCTAAAGTATGTGTTATAACATTTTTATAATTTTTGTTCACTGGTTGCAGGTTGCGGTTCTGCGTATAAATGCTTTGGTGCTAATGCAGCTGATCTAAGG…	TGTATACGATACAAGAGATGAAAAGGGAACGATGAGTGTATGTTTATATTTATGCCATAAGCTGCTAGATGTTCACACTAGATAACTAATACTAGGCCAAGAGCACAAAGAAGGTTCCATCGGTGAGTTTAAGGGGTTTGAGGCTTTTTGGGGTTTACACCCCAATGATGCAGCGGATCTGGACCAGAAGGAACCTTCCTTAACTCCCAATTCAGTGGCTTTTCACCATACTTGTTGCTTGATGATCCTTGCAGACTAGCCTTCAGAGCACTAGTTTTCTTATCCTTCAAAACAGACAGCACCTGCATATATACACCACAAGATAAAGTTATAGAAATTTACCCCAGAAACTATGTACCAAAAAAGATCTTTCTCACGTTACGATCATACAAAAATCAC…
Gmclv3-1/ft5b-1-4		CCTATAATACGTGTATTACCCTATGATCTTCaCCACACAACATTACTTGTTCACCACCTTGCTCTCCTTGCAACTTCCACCCCTACCACCTACCTTGATTCTCTTGAGACTTTTTTTCCAATGGCGTCAAAGTTTATCTTTACCACTGAGTCTTACGTATGCTTTTGTGCTTGCTTCTGATGAGGGAGCCGTCTGGTTTGTGAATGTTCTTTTTTTCTTGTTATTACCATAGTTATTTGAGTGACAAAGATTGGAATAAAAGATTGTGGATTGTTTTATTCATATTTTTGTTGATAGAGTGTGTGTTATATCATTCTTATAATTTTTGTTCACTGGTTGCAGGTTGCGGGTCTGCGAATGAATGCTTTGGTGCGAATGCGACTGATCGAACGGACATTC…	AGCGAAGGAGATGATGGTATATAGAGGAAGATGAGTGTGTGTTTGTATTTGTGCCATAAGCTGGTAGATGTTGGCACTTGATAACTAATACTAGGCCAAGAGCACAAAGAAGGTTGCATCGGCGAGTTTAAGGGGTTTGATGCTTTTTGAGGTTTTCCCCCCCATGATGCAGCGGATCTGGACCAGAAGGAACCTTCCTTAACTCCCAATTCAGTGGCTTTTCACCATACTTGTTGCTTGATGATCCTTGCAGACTAGCCTTCAGAGCACTAGTTTTCTTATCCTTCAAAACAGACAGCACCTGCATATATACACCACAAGATAAAGTTATAGAAATTTACCCCAGAAACTATGTACCAAAAAAGATCTTTCTCACGTTACGATCATACAAAAATCACG…
Gmclv3-1/ft5b-1-5		CGATCTCACTATAATACGTGTATTACCCTATGATCTTCACCACACAACATTACTTGTTCACCACCTTGCTCTCCTTGCAACTTCCACCCCTACCACCTACCTTGATTCTCTTGAGACTTTTTTTCCAATGGCGTCAAAGTTTATCTTTACCACTGGGTTTTACTTATGCTTTTGTGCTTGCTTCTGATGAGGGAGCCTTCTGGTTTGTCAATGTTCTTTTTTTCTTGTTATTACCATAGTTATTTGAGTGACAAATATTGAAATATAAGATTGTGTATTGTTTTATTCATTTTTTTGTTGCTAAAGTATGTGTTATAACATTTTTATAATTTTTGTTCACTGGTTGCAGGTTGCGGTTCTGCGTATAAATGCTTTGGTGCTAATGCAGCTGATCTAAGG…	TGTATACGATACAAGAGATGAAAAGGGAACGATGAGTGTATGTTTATATTTATGCCATAAGCTGCTAGATGTTCACACTAGATAACTAATACTAGGCCAAGAGCACAAAGAAGGTTCCATCGGTGAGTTTAAGGGGTTTGAGGCTTTTTGGGGTTTACACCCCAATGATGCAGCGGATCTGGACCAGAAGGAACCTTCCTTAACTCCCAATTCAGTGGCTTTTCACCATACTTGTTGCTTGATGATCCTTGCAGACTAGCCTTCAGAGCACTAGTTTTCTTATCCTTCAAAACAGACAGCACCTGCATATATACACCACAAGATAAAGTTATAGAAATTTACCCCAGAAACTATGTACCAAAAAAGATCTTTCTCACGTTACGATCATACAAAAATCAC…
Gmclv3-1/ft5b-1-6		CCTATAATACGTGTATTACCCTATGATCTTCACCACACAACATTACTTGTTCACCACCTTGCTCTCCTTGCAACTTCCACCCCTACCACCTACCTTGATTCTCTTGAGACTTTTTTTCCAATGGCGTCAAAGTTTATCTTTACCACTGTGGTTTTACTTATGCTTTTGTGCTTGCTTCTGATGAGGGAGCCTTCTGGTTTGTCAATGTTCTTTTTTTCTTGTTATTACCATAGTTATTTGAGTGACAAATATTGGAATATAAGATTGTGTATTGTTTTATTCATATTTTTGTTGCTAGAGTATGTGTTATAGCATTCTTATAATTTTTGTTCACTGGTTGCAGGTTGCGGTTCTGCGTATGAATGCTTTGGTGCTAATGCAGCTGATCTAAGGGACATT…	TACTGAAGCGACCAGATGAAAGAGGAAGATGAGTGTGATGTTGATATTTAGTGCCGTAAGCTGGTAGATGTTCGCACTAGATAACTAATACTAGGCCAAGAGCACAAAGAAGGTTGCATCGGTGAGTTTAAGGGGTTTGAGGCTTTTTGGGGTTGACACCACCATGATGCAGCGGATCTGGACCAGAAGGAACCTTCCTTAACTCCCAATTCAGTGGCTTTTCACCATACTTGTTGCTTGATGATCCTTGCAGACTAGCCTTCAGAGCACTAGTTTTCTTATCCTTCAAAACAGACAGCACCTGCATATATACACCACAAGATAAAGTTATAGAAATTTACCCCAGAAACTATGTACCAAAAAAGATCTTTCTCACGTTACGATCATACAAAAATCACG…
Gmclv3-1/ft5b-1-7		CTATAAATAACGTGTATTACCCTATGATCTTCACCACACAACATTACTTGTTCACCACCTTGCTCTCCTTGCAACTTCCACCCCTACCACCTACCTTGATTCTCTTGAGACTTTTTTTCCAATGGCGTCAAAGTTTATCTTTACCACTTTTTACTTATGCTTTTGTGCTTGCTTCTGATGAGGGAGCCTTCTGGTTTGTCAATGTTCTTTTTTTCTTGTTATTACCATAGTTATTTGAGTGACAAATATTGGAATATAAGATTGTGTATTGTTTTATTCATATTTTTGTTGCTAGAGAATGTGTTATAGCATTCTTATAATTTTTGTTCACTGGTTGCAGGTTGCGGTTCTGCGTATGAATGCTTTGGTGCTAATGCAGCTGATCTAAGGGACATTCCA…	TGTAAGTTACTCGCTATGCAAGAGATGAAAAGGAAGATGAGTGTATGTTTATATTTATGCCATAAGCTGGTAGATGTTCACACTGATAACTAATACTAGGCCAAGAGCACAAAGAAGGTTCCATCGGTGAGTTTAAGGGGTTTGAGGCTTTTTGGGGTTGACACCATTATGATGCAGCGGATCTGGACCAGAAGGAACCTTCCTTAACTCCCAATTCAGTGGCTTTTCACCATACTTGTTGCTTGATGATCCTTGCAGACTAGCCTTCAGAGCACTAGTTTTCTTATCCTTCAAAACAGACAGCACCTGCATATATACACCACAAGATAAAGTTATAGAAATTTACCCCAGAAACTATGTACCAAAAAAGATCTTTCTCACGTTACGATCATACAAAAA…
Gmclv3-1/ft5b-1-8		ACCTATAAATAACGTGTATTACCCTATGAATCTTCACCACACAACATTACTTGTTCACCACCTTGCTCTCCTTGCAACTTCCACCCCTACCACCTACCTTGATTCTCTTGAGACTTTTTTTCCAATGGCGTCAAAGTTTATCTTTACCACTGTACTTACGCTTGCGTGCTTGCTTGTGACGAAGGAGGCATCCGGCTGGTCAATGAACGTTTTTTCTTGCTAGTACCAACGATATTTGAGTGACAGATATTGAAAGAAAAAATTGAGTATGGATTGATTCATATTTATGTTGGTAGAGAAAGTGTGATAGCATTCTTATAAATAATGTTCGCTGGCTGCAGGTTGGGGGTCTGCGTATGAATGATTTGGTGCTAGTGCATGTGATCGATCGGACGTACC…	TGATACGAAAACAAGAGATGAAAAGGCAAACGATGAGTGTATGTTTATATTTATGCCATAAGCTGCTAGATGTTCACACTGATAACTAATACTACGCCAAGAGCACAAAGAAGGTTCCATCGGTGAGTTTAAGGGGTTTGAGGCTTTTTGGGGTTTACCCCCCAATGATGCAGCGGATCTGGACCAGAAGGAACCTTCCTTAACTCCCAATTCAGTGGCTTTTCACCATACTTGTTGCTTGATGATCCTTGCAGACTAGCCTTCAGAGCACTAGTTTTCTTATCCTTCAAAACAGACAGCACCTGCATATATACACCACAAGATAAAGTTATAGAAATTTACCCCAGAAACTATGTACCAAAAAAGATCTTTCTCACGTTACGATCATACAAAAATCAC…
Gmclv3-1/ft5b-1-9		CTATAATACGTGTATTACCCTATGATCTTCaCCACACAACATTACTTGTTCACCACCTTGCTCTCCTTGCAACTTCCACCCCTACCACCTACCTTGATTCTCTTGAGACTTTTTTTCCAATGGCGTCAAAGTTTATCTTTACCACTGGTGTTTCTTTTGCTTTTGTGGTTGTTGCTGATGAGGGAGGCTTCTGGGTTGTTGATGTTGTTTTTTTTTTGTTATTAACATAGTTATTTGAGGGAAAAAGATTGGAGAATAAGAATGGGGTTTGTTTTATTATTATTTTTGTTGGTGAAGTAGGTGGTATAACATTCTTATTATTTTTTTTGACGGGGGGGAGGTGGGGGTTCTGGGGATGAAGGCTTTGGTGCTGATGCAGCTGATCTAAGGGGCCTTACC…	ACGTATACACAGATGATAAATGGCAACGATGAGTGTATGTTTATATTTATGCCATAATCTGCTAGATGTTCACACTAGATAACTACTACTACGCCAAGAGCACAAAGAAGGTTCCATCGGTGAGTTTAAGGGGTTTGAGGCTTTTTGGGGTTTCCACCCCAATGATGCAGCGGATCTGGACCAGAAGGAACCTTCCTTAACTCCCAATTCAGTGGCTTTTCACCATACTTGTTGCTTGATGATCCTTGCAGACTAGCCTTCAGAGCACTAGTTTTCTTATCCTTCAAAACAGACAGCACCTGCATATATACACCACAAGATAAAGTTATAGAAATTTACCCCAGAAACTATGTACCAAAAAAGATCTTTCTCACGTTACGATCATACAAAAATCACGTG…
Gmclv3-1/ft5b-1-10		CTATAAATACGTGTATTACCCTATGAATCTTCACCACACAACATTACTTGTTCACCACCTTGCTCTCCTTGCAACTTCCACCCCTACCACCTACCTTGATTCTCTTGAGACTTTTTTTCCAATGGCGTCAAAGTTTATCTTTACCACTGGTTTTACTTATGCTTTTGTGCTTGCTTCTGATGAGGGAGCCTTCTGGTTTGTCAATGTTCTTTTTTTCTTGTTATTACCATAGTTATTTGAGTGACAAATATTGGAATATAAGATTGTGTATTGTTTTATTCATATTTTTGTTGCTAGAGTATGTGTTATAACATTCTTATAATTTTTGTTCACTGGTTGCAGGTTGCGGTTCTGCGAATGAATGCTTTGGTGCTAATGCAGCTGATCTAAGGGACATTC…	TAGGAAGGAAGAGATGATAAGAGGAAGATGGAGTGTGTGTTTGTATTTGTGCCATAAGCTGGTAGATGTTGGCACTTAATAACTAATACTAGGCCAAGAGCACAAAGAAGGTTGCATCGGTGAGTTTAAGGGGTTTGAGGCCTTTTGGGGATTACCCCCCCATGATGCAGCGGATCTGGACCAGAAGGAACCTTCCTTAACTCCCAATTCAGTGGCTTTTCACCATACTTGTTGCTTGATGATCCTTGCAGACTAGCCTTCAGAGCACTAGTTTTCTTATCCTTCAAAACAGACAGCACCTGCATATATACACCACAAGATAAAGTTATAGAAATTTACCCCAGAAACTATGTACCAAAAAAGATCTTTCTCACGTTACGATCATACAAAAATCACGTG…
Gmclv3-1/ft5b-1-11		AAGAACCTATAATACGTGTATTACCCTATGATCTTCACCACACAACATTACTTGTTCACCACCTTGCTCTCCTTGCAACTTCCACCCCTACCACCTACCTTGATTCTCTTGAGACTTTTTTTCCAATGGCGTCAAAGTTTATCTTTACTACTGAGTTTGACGTTAGGTTCTGATGATTGATTCTGATGAGGGATCCATGTGGTTTGTCTCTGGTCTTTTCTTCTTGTAATTACCAGACAAATATTGGAGAAAAATATTGGGAATTGATATAGTGAAATGTTTGATTCAAAAGTATGTGGCAAAACAATCTGATAAATCATTCTCACTATTTGTGTGCAGTGGTTGCACGTAGGAATGCTGCGGAGGAATGGTTTGTGACCAATGGAACTTATCTAACGG…	CGGGTTTTTAATCGCGATGCAGAGATGATGGGAAGATGAGTGTATGTTTATATTTATGCCATAAGCTGGTAGATGTTGGACTGATAACTAATACTAGGCCAAGAGCACAAAGAAGGTTCCATCGGTGAGTTTAAGGGGTTTGAGGCTTTTTGGGGTTGACACCATTATGATGCAGCGGATCTGGACCAGAAGGAACCTTCCTTAACTCCCAATTCAGTGGCTTTTCACCATACTTGTTGCTTGATGATCCTTGCAGACTAGCCTTCAGAGCACTAGTTTTCTTATCCTTCAAAACAGACAGCACCTGCATATATACACCACAAGATAAAGTTATAGAAATTTACCCCAGAAACTATGTACCAAAAAAGATCTTTCTCACGTTACGATCATACAAAAATC…
Gmclv3-1/ft5b-1-12		TACCTATAATACGTGTATTACCCTATGATCTTCACCACACAACATTACTTGTTCACCACCTTGCTCTCCTTGTCAACTTCCACCCCTACCACCTACCTTGATTCTCTTGAGACTTTTTTTCCAATGGCGTCAAAGTTTATCTTTACCACTGAGGGTTTCTTTTATGTTTTTGTTTTTGCTTCTGAAGGGGGACCCTTCGGTTTTGTCAGTGTTTTTTTTTTCTTGTTTTCACCATATTTTTTTGAGACACAAATAGTGAAATATAATATTGTGTAGTGTTTTTTTCATATTTTTGTCGCTAGAATATGTGTTATAACATTCTTATATTTTTTGCTCTGTGGGTGCGGGTTGCGGCTCTGCATAAGAGTGCTTGGGCGCTAGTGCCTCTGATCTAGGGCA…	AGAGATGAAAGGAAGATGAGTGTATGTTTATATTTATGCCATAAGCTGGTAGATGTTCACACTGATAACTAATACTAGGCCAAGAGCACAAAGAAGGTTCCATCGGTGAGTTTAAGGGGTTTGAGGCTTTTTGGGGTTGACACCATTATGATGCAGCGGATCTGGACCAGAAGGAACCTTCCTTAACTCCCAATTCAGTGGCTTTTCACCATACTTGTTGCTTGATGATCCTTGCAGACTAGCCTTCAGAGCACTAGTTTTCTTATCCTTCAAAACAGACAGCACCTGCATATATACACCACAAGATAAAGTTATAGAAATTTACCCCAGAAACTATGTACCAAAAAAGATCTTTCTCACGTTACGATCATACAAAAATCACGTGAAAAAAAGAGAGAG…
