# Supplementary material for: A rhizobium-induced FT-FD module locally activates nodule stem cell gene
Source: Research Square preprint supplement (doi:10.21203/rs.3.rs-5006581/v1), 2025-03-18
Supplement: Supplementary file 3 [file 59a0da392f6ee26e03bf516d.docx]

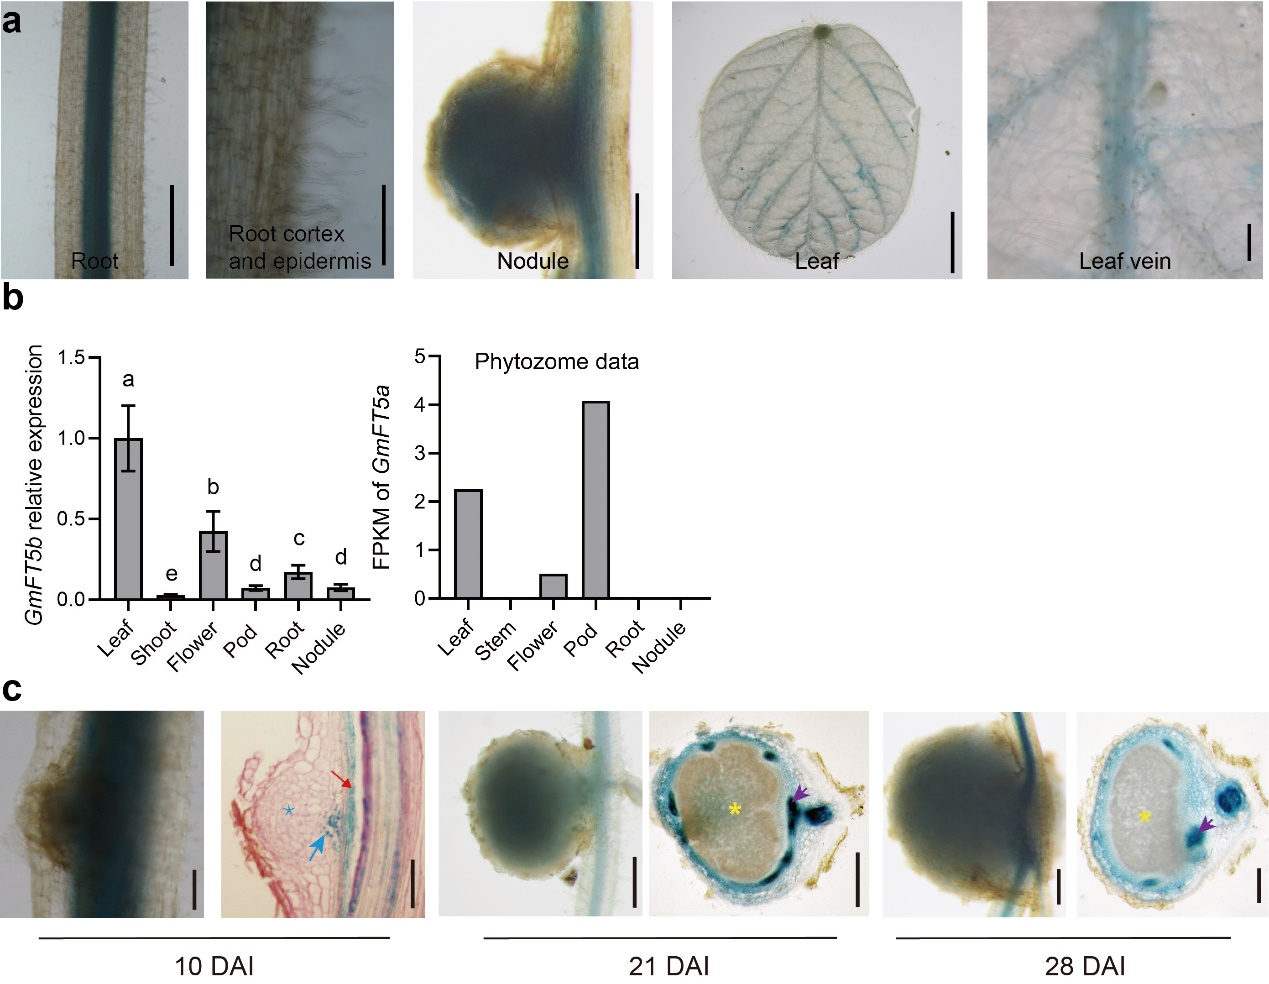


**Extended Data Fig. 1 |** ***GmFT5b* expression patterns. a**,*GmFT5bpro:GUS* activity in roots without rhizobial infection (scale bar = 100 μm (left) and 10 μm (right)), nodule (scale bar = 500 μm), leaf (scale bar = 1 cm) and leaf vein (scale bar = 500 μm). **b**, Relative expression levels by RT-qPCR (left) and the FPKM value of by RNA-seq data provided from phytozome(right) of *GmFT5b* in leaves, stems, flowers, pods, roots, and nodules. **c**, *GmFT5bpro:GUS* activity in nodules at various times after inoculation (10 DAI, scale bar = 100 μm; 21 DAI, scale bar = 500 μm, and 28 DAI, scale bar = 500 μm). Red arrow indicates the pericycle cells, blue arrow indicates the primordium cells, blue asterisk indicates nodule primordium, violet arrow indicates the nodule vascular tissues, and yellow asterisk indicates the infection zone. DAI, days after inoculation. *GmUKN1* is used as the reference gene (**b**). Data are mean ± s.d. with *n* = 3 (**b**) biological replicates; One-way ANOVA with Bonferroni post hoc test (**b**), different letters indicate *p* < 0.05.


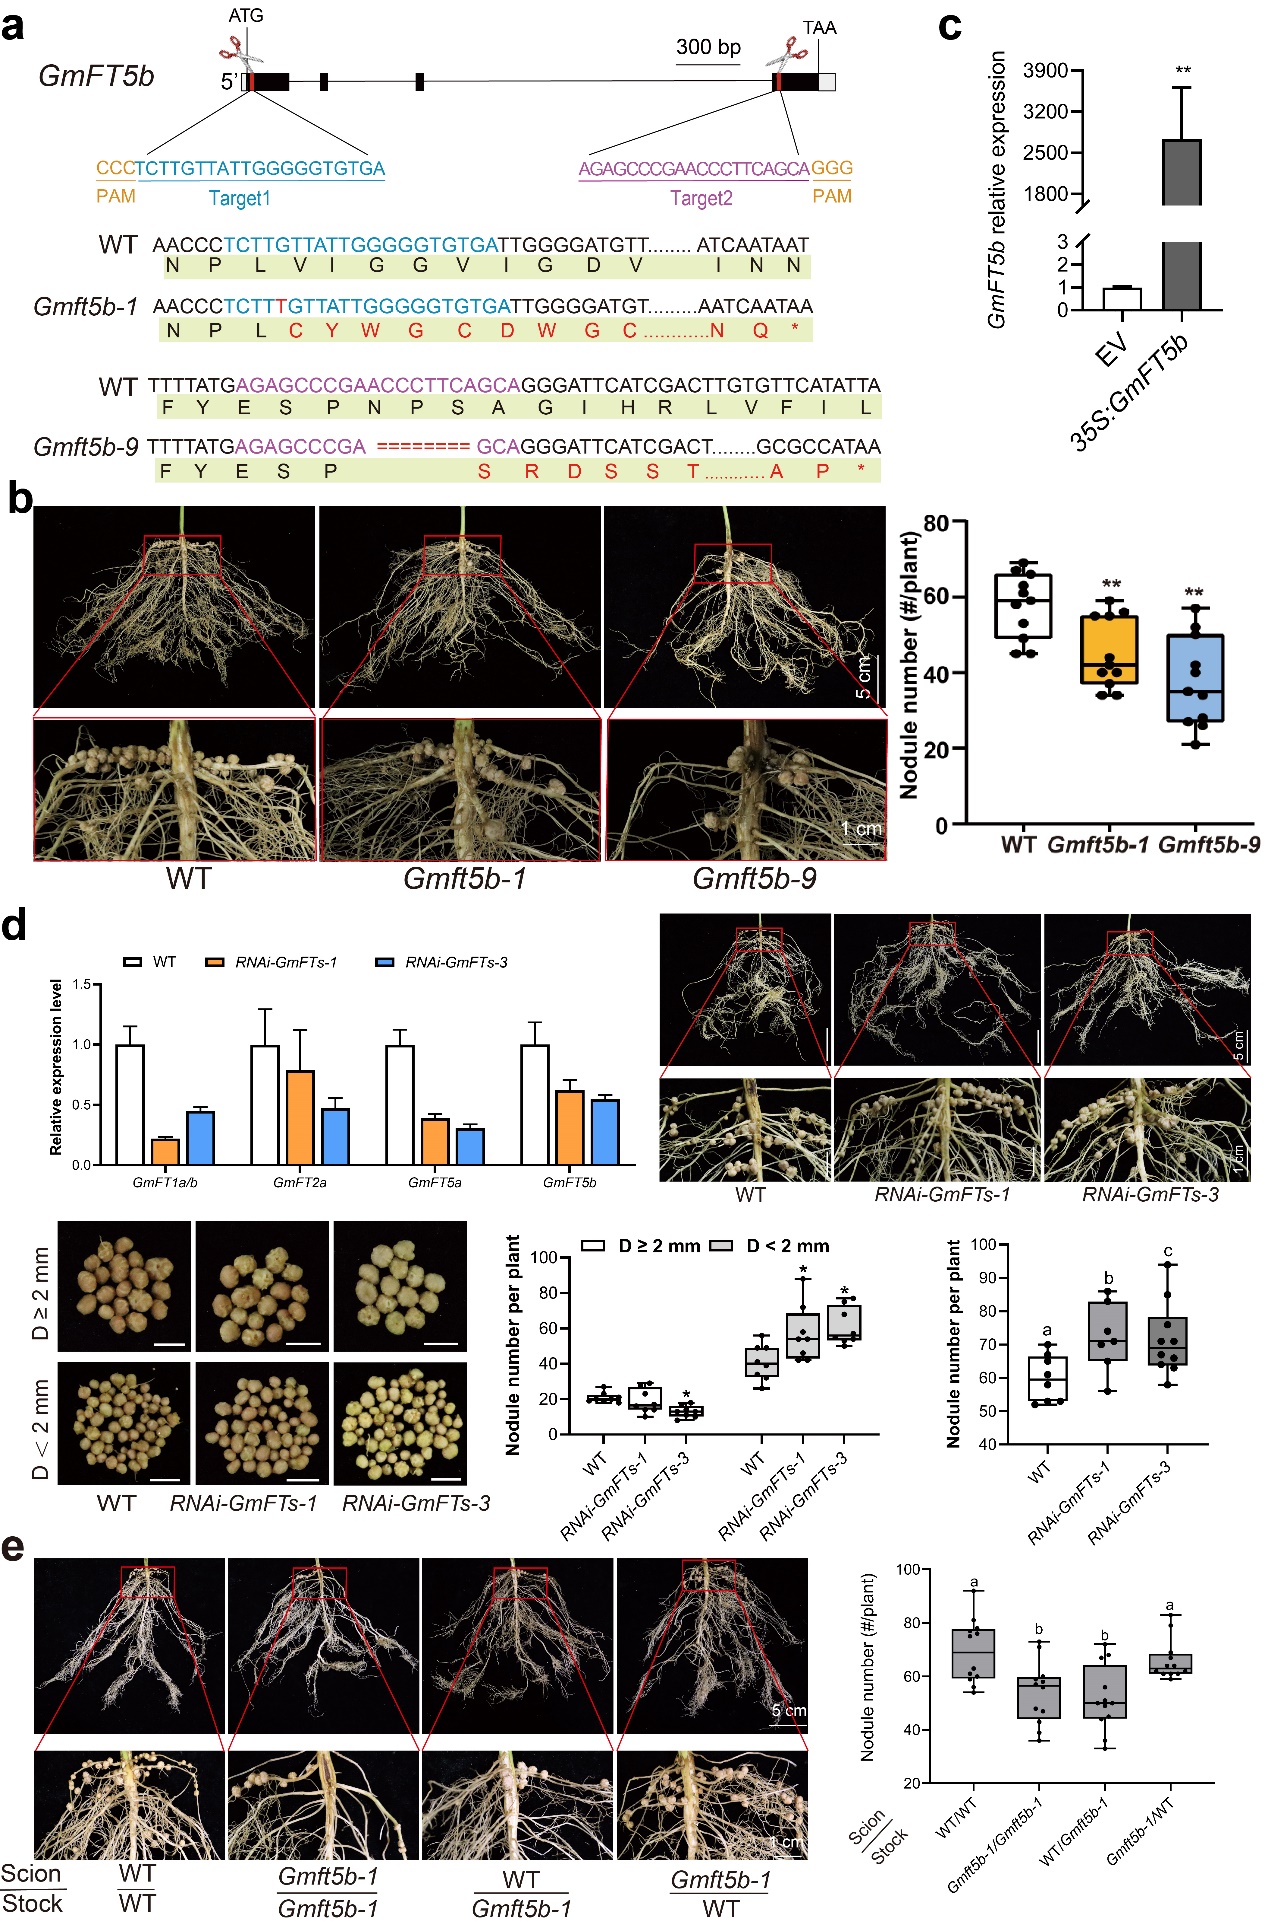


**Extended Data Fig. 2 |** **Effects of *GmFT5b* on soybean nodulation. a**, Two sgRNAs target sequences and positions in gene sequence and the gene editing results in the *GmFT5b* knockout lines. Blue bases indicate the first target sequence, violet bases indicate the second target sequence, red bases indicate the insert base, the red amino acid indicate the altered amino. Dashes indicate the deleted bases. **b**,Images and number nodules in WT and *GmFT5b* knockout lines at 21 DAI. **c**,Relative expression levels of *GmFT5b* in *35S:GmFT5b* hairy roots. **d**, Nodule phenotypes and relative expression levels of *GmFTs* in *GmFTs* RNAi lines. **e**,Images and number of nodules in reciprocal grafting between WT and *Gmft5b-1* mutant at 21 DAI. WT, wild-type; EV, empty vector. Scale bar = 1 cm (**b**, **d, e**). *GmUKN1* is used as the reference gene (**c, d**). Data are normalized to the expression level in EV (**c**) or WT (**d**). Data are mean ± s.d. with *n* = 11 (**b**), *n* = 3 (**c**), *n* =13 (**d**) or *n* = 14 (**e**) biological replicates; two-tailed Student’s *t*-test (**b, c, d**), * *p* <0.05, ** *p* <0.01; One-way ANOVA with Bonferroni post hoc test (**c**, **e**), different letters indicate *p* < 0.05.


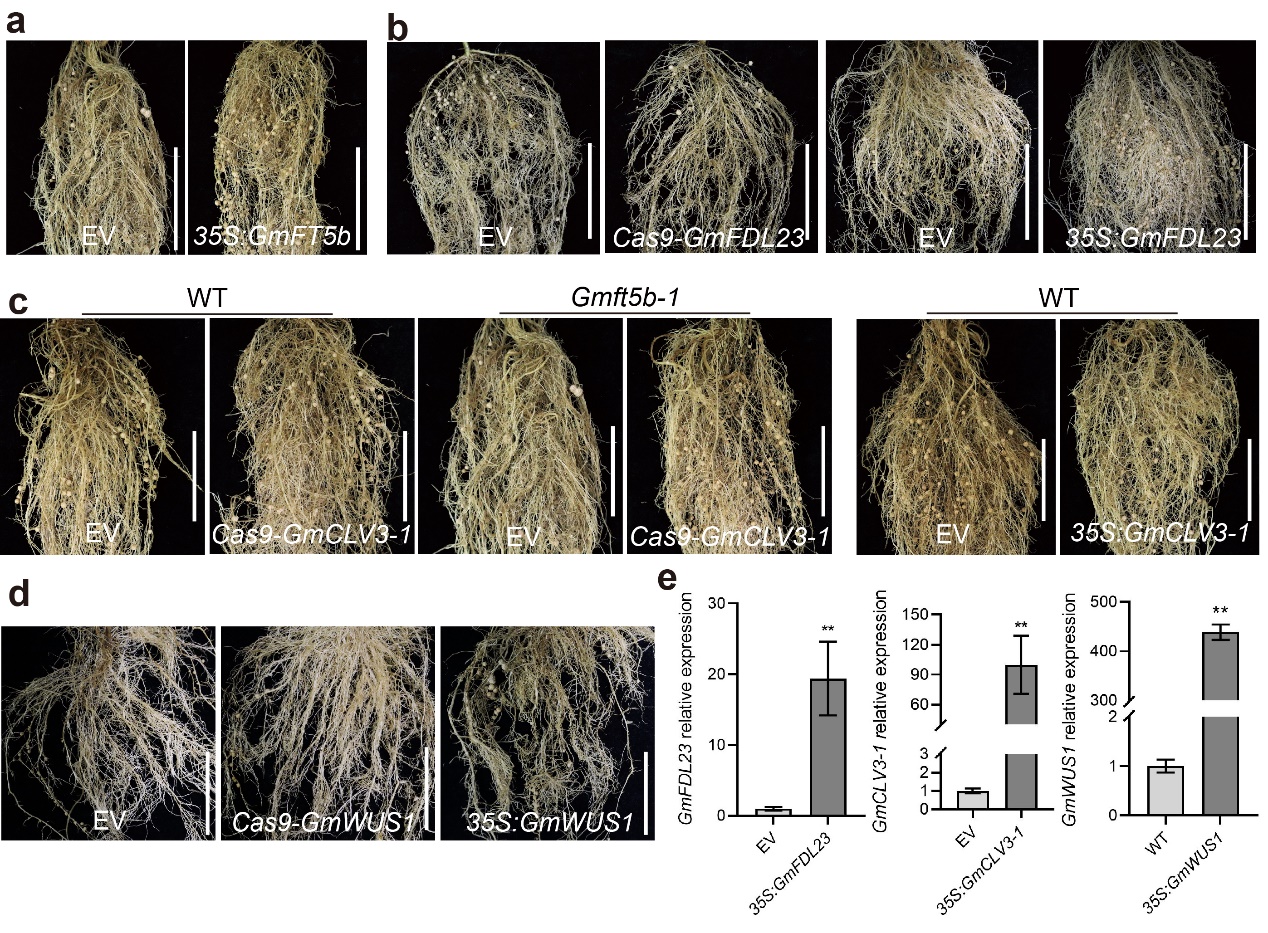


**Extended Data Fig. 3 |** **Images of hairy roots of different genetic modified lines** **at 21 DAI.** **a**, *35S:GmFT5b*. **b**,*Cas9*-*GmFDL23* and *35S:GmFDL23*. **c**,*Cas9*-*GmCLV3-1* and *35S:GmCLV3-1* in WT or *Gmft5b-1* background. **d**,*Cas9*-*GmWUS1* and *35S:GmWUS1*. **e**,Relative expression levels of *GmFDL23*, *GmCLV3-1* and *GmWUS1* in overexpressed hairy roots. WT, wild-type; EV, empty vector. Scale bar = 5 cm (**a, b, c, d**). *GmUKN1* is used as the reference gene (**e**). Data are normalized to the expression level in EV of RT-qPCR analysis. Data are mean ± s.d. with *n* = 3 (**e**) biological replicates; two-tailed Student’s *t*-test (**e**), ** *p* <0.01.


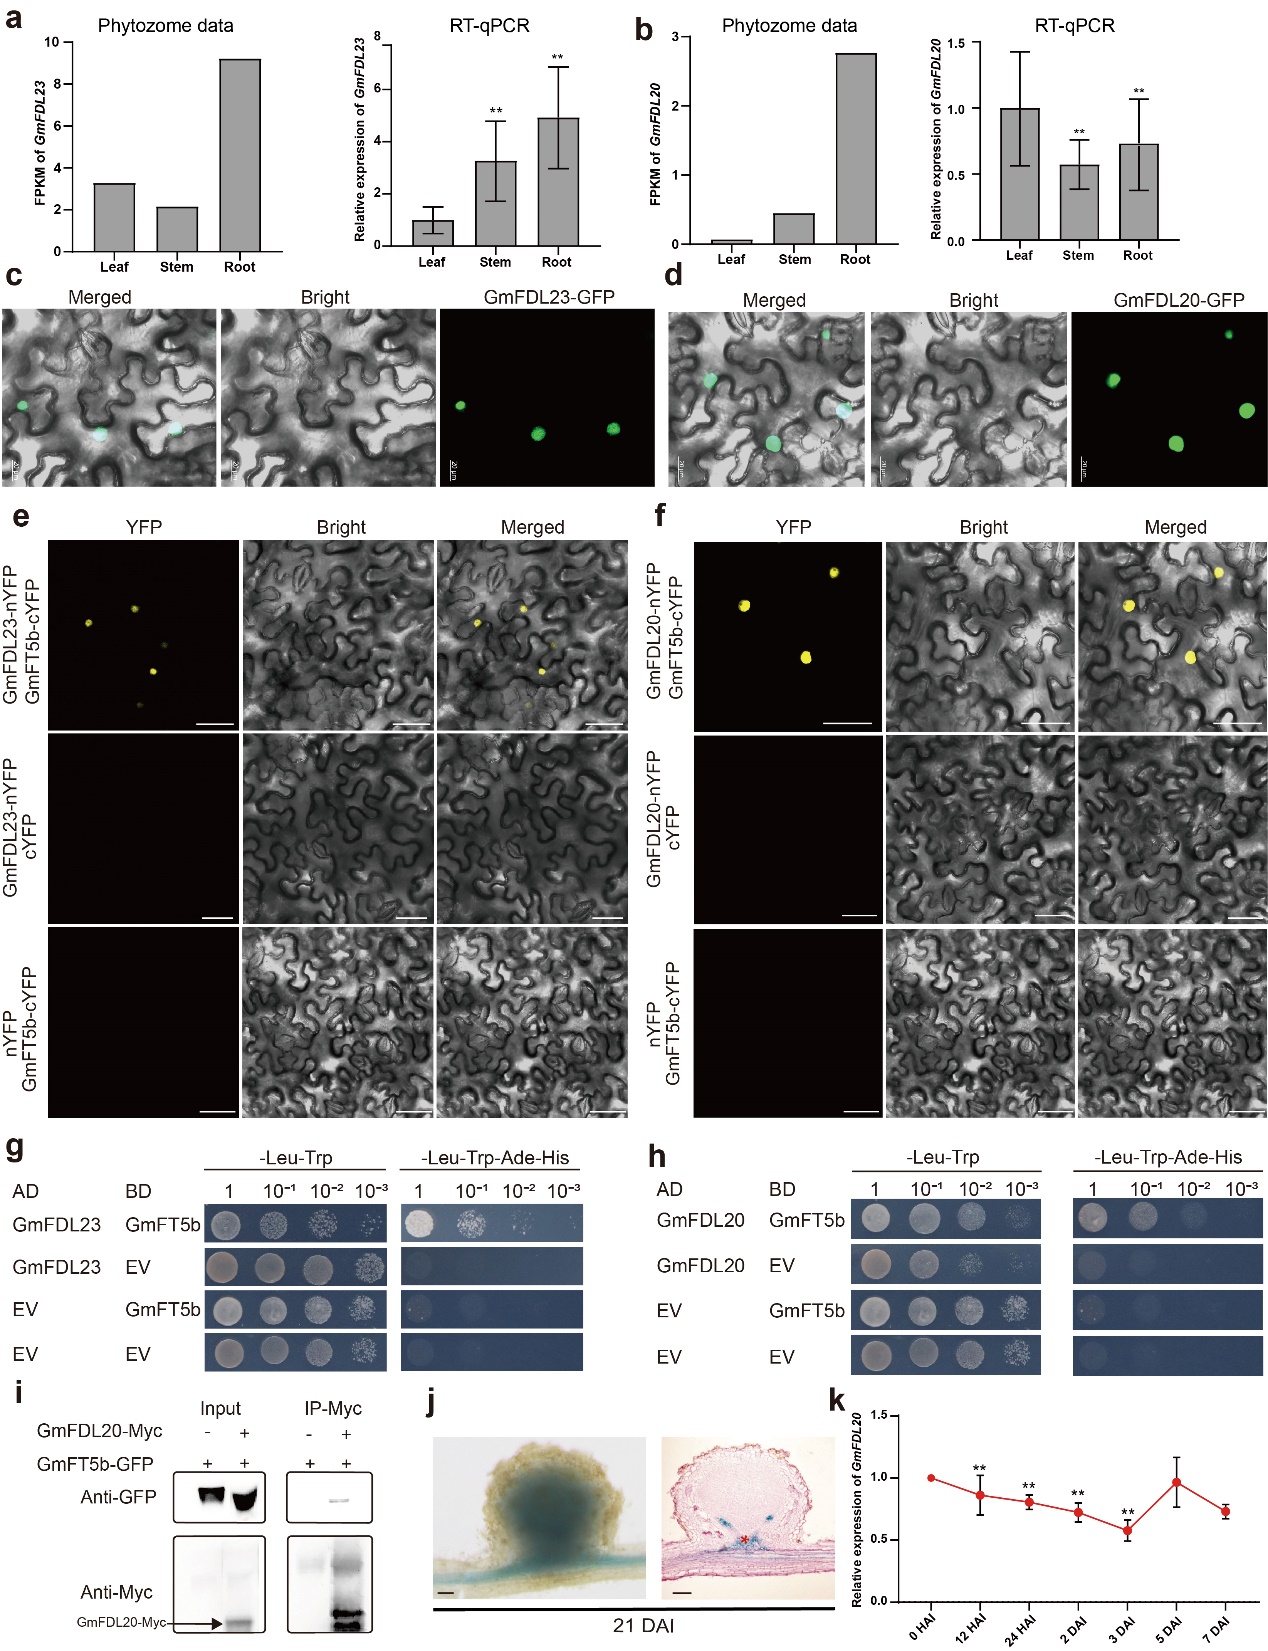


**Extended Data Fig. 4 |** **Expression pattern and interaction with *GmFT5b* of *GmFDL23* and *GmFDL20*. a** and **b**,The FPKM value of RNA-seq data provided from phytozome and relative expression levels by RT-qPCR of *GmFDL23* (**a**)and *GmFDL20* (**b**) in leaves, stems and roots. **c** and **d**,Subcellular localization of GmFDL23 (**c**) and GmFDL20 (**d**) proteins in *N. benthamiana* leaves. **e** and **f**, BiFC assay for the interaction between GmFT5b-cYFP and GmFDL23-nYFP (**e**) or GmFDL20-nYFP (**f**) in *N. benthamiana* leaves. **g** and **h**,Y2H assay for the interaction between GmFT5b and GmFDL23 (**g**) or GmFDL20 (**h**). The yeast was initially grown on SD-Leu/-Trp medium and then transferred to SD-Leu/-Trp/-His/-Ade medium. i, Co-IP assay for GmFDL20-Myc and GmFT5b-GFP in *N. benthamiana* leaves. Proteins were immunoprecipitated (IP) with anti-Myc beads and probed by anti-Myc or anti-GFP antibody. **j,** *GmFDL23pro:GUS* activity in nodules (left) and its longitudinal-section image (right) at 21 DAI. Red asterisk indicates the nodule vascular tissue. **k,** Time-course expression level of *GmFDL20* in roots after HH103 inoculation. HAI, hours after inoculation; DAI, days after inoculation; EV, empty vector. Scale bar = 20 μm (**c**, **d**), 50 μm (**e**, **f**) or 200 μm (**j**). *GmUKN1* is used as the reference gene (**a**, **b**, **k**). Data are normalized to the expression level in leaf (**a**, **b**) or uninfected roots (**k**) of RT-qPCR analysis. Data are mean ± s.d. with *n* = 3 (**a**, **b**, **k**) biological replicates; two-tailed Student’s *t*-test (**a**, **b**, **k**), ** *p* <0.01.


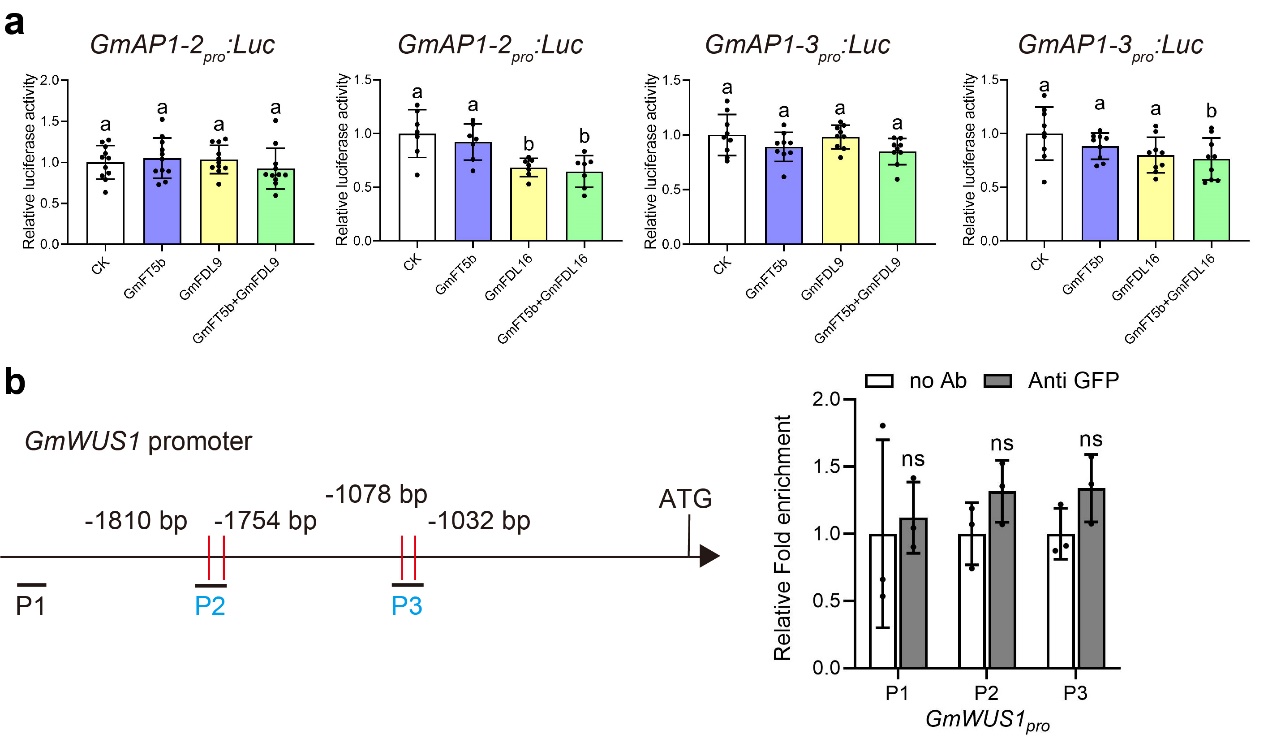


**Extended Data Fig. 5 |** ***GmFDL* did not activate *GmAP1* and *GmWUS1* genes.** **a**,Luciferase activityof *GmAP1-2pro:LUC* and *GmAP1-3pro:LUC*in *N. benthamiana* leaves. *GmAP1.2pro:LUC* and *GmAP1.3pro:LUC* were co-infiltrated with *35S:GFP*, *35S:GmFT5b*, *35S:GmFDL9/16*, or *35S:GmFT5b* and *35S:GmFDL9/16* into *N. benthamiana* leaves. *35S:GFP* was served as a negative control effector. CK, *35S:GFP*. Data are normalized to the negative control of luciferase activity analysis. **b**,ChIP–qPCR assay to identify the binding of GmFDL23 to *GmWUS1pro*. DNA fragments are shown in the left panel. Red vertical lines indicate the predicted binding site of promoters. Data are mean ± s.d. with *n* ≥ 7 (**a**) or *n* = 3 (**b**) biological replicates. One-way ANOVA with Bonferroni post hoc test (**a**), different letters indicate *p* < 0.05; two-tailed Student’s *t*-test (**b**), ns, no significant.


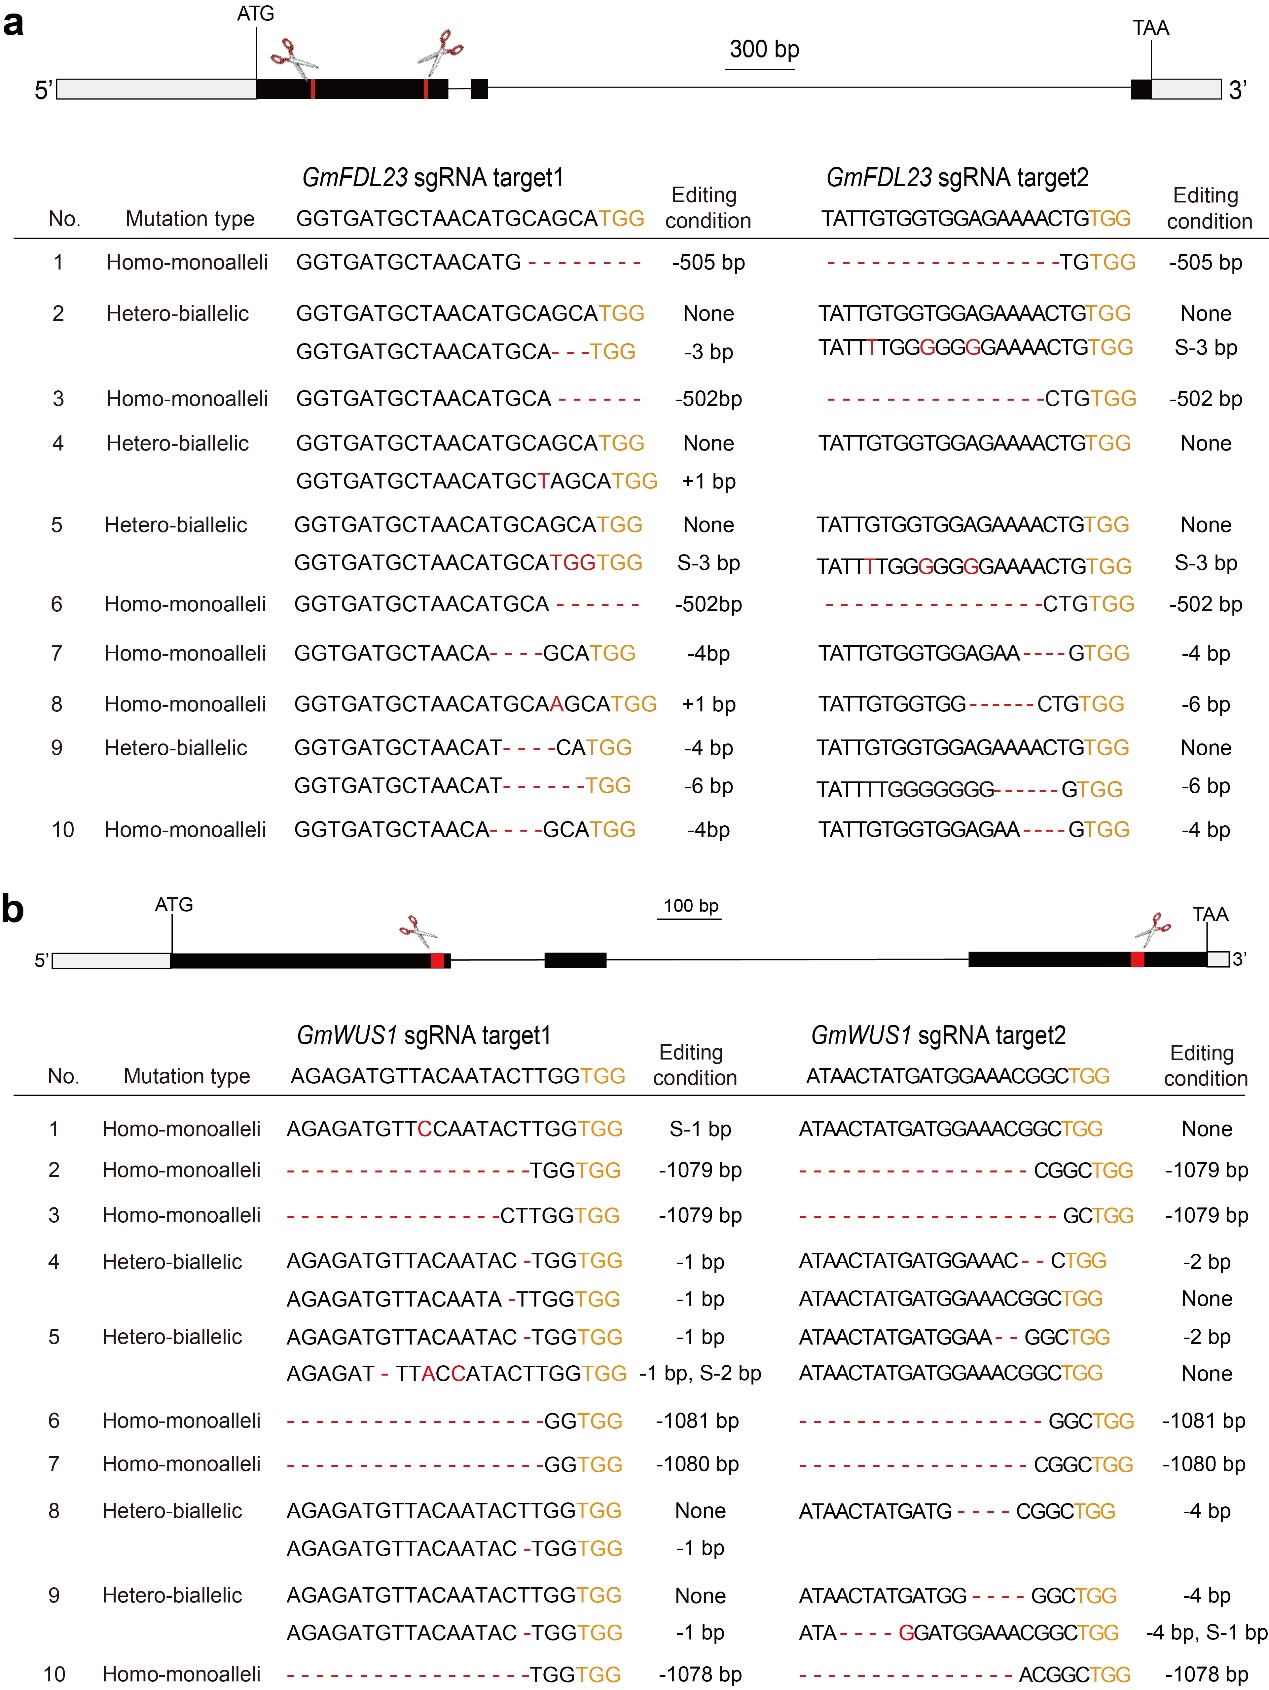


**Extended Data Fig. 6.** **Identification of *Cas9*-*GmFDL23* and *Cas9-GmWUS1* edited hairy roots. a,** Two *sgRNAs* position of *GmFDL23* and the gene editing conditions of *Cas9*-*GmFDL23* hairy roots. Orange letters indicate the PAM. The letter “S” indicates base substitution. “None” indicates none editing. Dashes indicate deleted bases, red letters indicate insert bases. **b,** Two *sgRNAs* position of *GmWUS1* and the gene editing conditions of *Cas9*-*GmWUS1* hairy roots. Orange letters indicate the PAM. The letter “S” indicates base substitution. “None” indicates none editing. Dashes indicate the deleted bases, red letters indicate the insert bases.

**
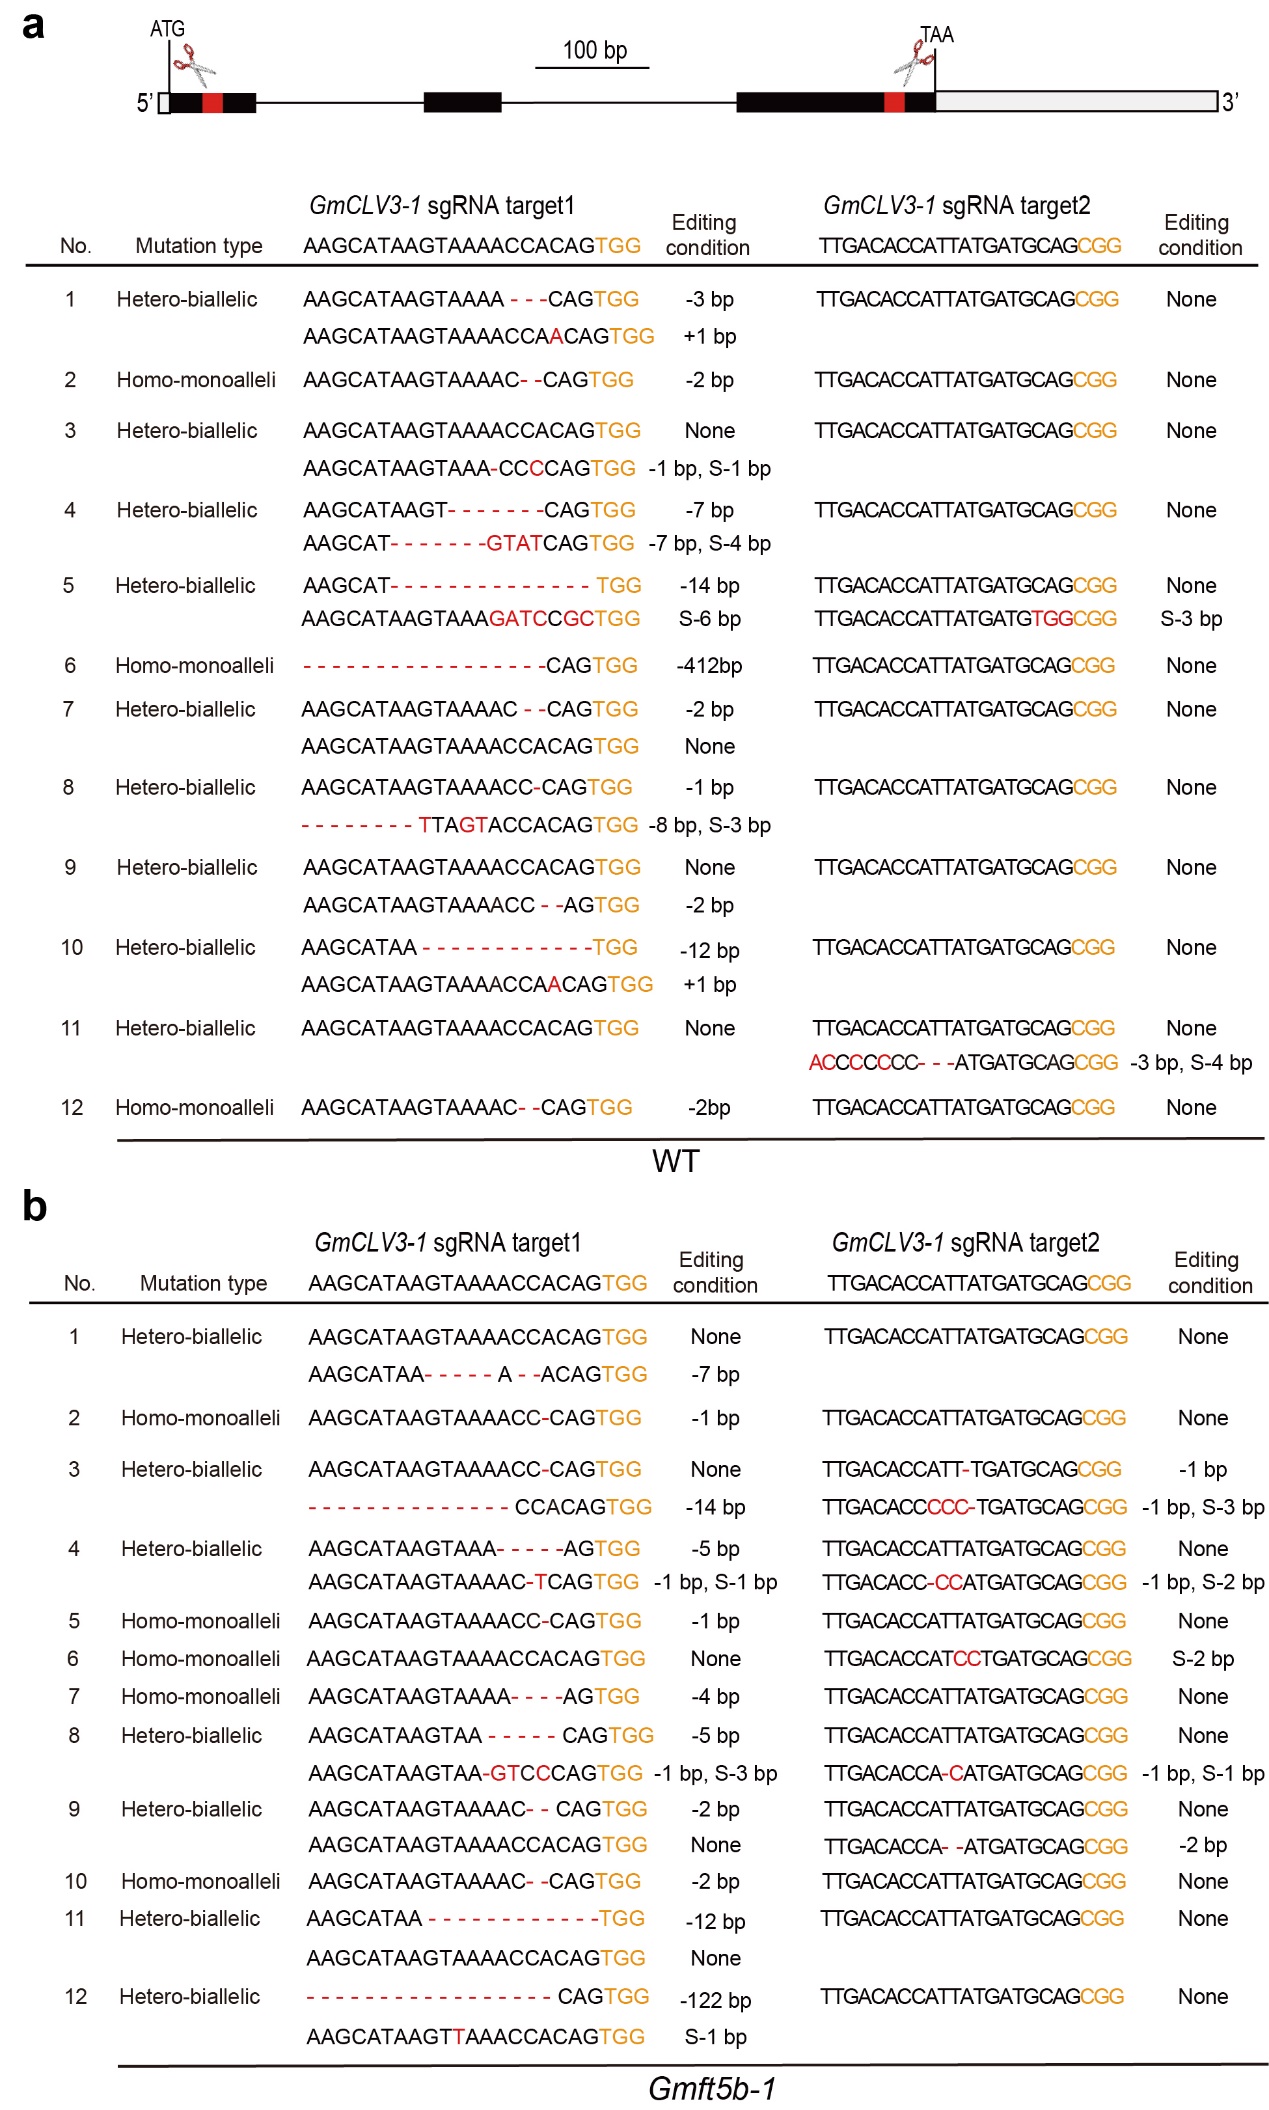
**

**Extended Data Fig. 7.** **Identification of distinct *Cas9*-*CLV3-1* hairy roots** **under** **Williams 82 and *Gmft5b-1* background. a, b,** Gene editing conditions of *Cas9*-*GmCLV3-1* hairy roots under Williams 82 (**a**) and *Gmft5b-1*(**b**) background. Orange letters indicate the PAM. The letter “S” indicates base substitution. “None” indicates none editing. Dashes indicate the deleted bases, red letters indicate the insert bases.
