# Supplementary material for: A rhizobium-induced FT-FD module locally activates nodule stem cell gene
Source: Research Square preprint supplement (doi:10.21203/rs.3.rs-5006581/v1), 2025-03-18
Supplement: Supplementary file 4 [file fbb97d88c3f0f583454051b0.xlsx]

## Sheet: Sheet1
Primer name	Seuqence 5'--3'	Function
GmUKN1-F	GAGCCCAAGACATTGCGAGAG	RT PCR
GmUKN1-R	CGGAAGCGGAAGAACTGAACC	RT PCR
GmFT1a/b-RT-F	TTGTGTTATTCCGTCAAC	RT PCR
GmFT1a/b-RT-R	AATGTTCTACCACCAGAG	RT PCR
GmFT2a-RT-F	TTGTGTTATTTCGTCAACTGGG	RT PCR
GmFT2a-RT-R	GGCAATCCAAGGTTGTAAAGTT	RT PCR
GmFT5a-RT-F	TTATGCCAACTGCCAAAGAGAG	RT PCR
GmFT5a-RT-R	GGAGTAAGGCATCCAAGAATCT	RT PCR
GmFT5b-RT-F	CTGGATGGTGACAGATAT	RT PCR
GmFT5b-RT-R	TTGCTGGAATAATATGAACA	RT PCR
GmFDL20-RT-F	GTATTGTTACAACTAGCGGCTG	RT PCR
GmFDL20-RT-R	GAATTCACTCTCCGAAGCATTC	RT PCR
GmFDL23-RT-F	ACATGGTCATTGGTTGCAATAC	RT PCR
GmFDL23-RT-R	GACCCAGAGTTTGTGTATCAGA	RT PCR
GmCLV3-1-RT-F	GTGCTGTCTGTTTTGAAGGA	RT PCR
GmCLV3-1-RT-R	GTTGACACCATTATGATGCA	RT PCR
ErnA-RT-F	TCCTTTCATAGTTCATAATG	RT PCR
ErnA-RT-R	GATAGATTGAGTGGAGAG	RT PCR
GmNINa-RT-F	TGGCGCACCATGCTAACAT	RT-PCR
GmNINa-RT-R	GGGTGTCATGGCAATCCTTT	RT-PCR
GmNINb-RT-F	ATTGGCGTGTGTCCCACAAC	RT-PCR
GmNINb-RT-R	TGCAGGAGAGGATGATTGAGAAG	RT-PCR
GmNSP1a-RT-F	GATGCTAACCACAGGCTTGCA	RT-PCR
GmNSP1a-RT-R	GGCTCGCTGGAAGCAAAAG	RT-PCR
GmERN1-RT-F	GCAATGGAAATGACAACAATGACC	RT-PCR
GmERN1-RT-R	CGATCAAAGACAGGTCCAAAACAC	RT-PCR
GmENOD40-RT-F	TCTCTCTTGAGTGGCAGAAGCA	RT-PCR
GmENOD40-RT-R	TGGAGTCCATTGCCTTTTCG	RT-PCR
GmNFYA-C-RT-F	GGAACTTCTGTTGCAGTTTCTTG	RT-PCR
GmNFYA-C-RT-R	GGATGAGTTGCCTAAGCAGTAG	RT-PCR
GUS-RT-F	TTATGCGGGCAACGTCTG	RT-PCR
GUS-RT-R	CCCACACTTTGCCGTAATG	RT-PCR
GmWUS1-RT-F	TAAGATTGAAGGCAAGAATG	RT-PCR
GmWUS1-RT-R	AAGCAGCAGAAGGATTAG	RT-PCR
GmCLV3-1-P4-F-5' Biotin	ATCCTTGAATCATACCACTATAAATACGTGTATTACCCTATGATCTTCACCACA	EMSA
GmCLV3-1-P4-F	TGTGGTGAAGATCATAGGGTAATACACGTATTTATAGTGGTATGATTCAAGGAT	EMSA
GmCLV3-1-P4-R	ATCCTTGAATCATACCACTATAAATACGTGTATTACCCTATGATCTTCACCACA	EMSA
GmFT5bpro-1F	TATTGCGGCCGCTTTGAGTTGGGAG	Vector construction
GmFT5bpro-1R	CGGGGCCGTAGAGACCATTTCTAAA	Vector construction
GmFT5bpro-2F	GCCGCTGCAGGGTCTCTAATATACT	Vector construction
GmFT5bpro-2R	GCCAACCCATGGCTTCTATGGATTA	Vector construction
GmFT5bpro-3F	CTTAAGGGTACCGAAGTAGATGTTG	Vector construction
GmFT5bpro-3R	TAATCTCGTACGGCGCGTATGCTAT	Vector construction
GmFT5bpro-4F	AGAGAACGCGCAAAACTCAAGGCTA	Vector construction
GmFT5bpro-4R	CCCGCTCTTAAGGCTTTATGTTAGA	Vector construction
GmFDL23pro-F	atgcatgaattctctagaCGATATGGAGTAGGTGTAGG	Vector construction
GmFDL23pro-R	ggccgcaagcttggatccTCTTCTCAACCTCAACAAGA	Vector construction
GmCLV3-1pro-F	CCGCTCGAGGGAAAGAATATATATAAG	Vector construction
GmCLV3-1pro-R	CCGGGATCCCAAGGTGGTGAACAAGTAATG	Vector construction
GmWUS1pro-F	CCGCTCGAGATACCCGAGAGAAACATATG	Vector construction
GmWUS1pro-R	CCGGGATCCGATAGATGAGGCACAGGCAC	Vector construction
GmWOX5pro-F	CCGCTCGAGATTGTTCTACGGCTTAATT	Vector construction
GmWOX5pro-R	CCGGGATGTTTTGCTTCTGATCCTCAA	Vector construction
GmAP1.2pro-F	TCGAGTCGACGATTGTAAAGGGGTTGTTG	Vector construction
GmAP1.2pro-R	CCCGGATCCTCTTCTGGAGGAGAAAA	Vector construction
GmAP1.3pro-F	AATCGAGCTCACCACCCTTCCCAATCAG	Vector construction
GmAP1.3pro-R	GAACGGTACCCTATCTGGGACTGGGGTTTG	Vector construction
GmFDL23-BamHI-F-PET28a	CAAATGGGTCGCGGATCCATGGGATCTCAAGGTGGGGC	Vector construction
GmFDL23-SalI-R-PET28a	GGCCGCAAGCTTGTCGACAAAGATGGCTGAACTAGTTC	Vector construction
GmFDL23-XbaI-F-Fu28	gattagAGATCTtctagaATGGGATCTCAAGGTGGGGC	Vector construction
GmFDL23-SalI-R-Fu28	atgcatATTAATgtcgacAAAGATGGCTGAACTAGTTC	Vector construction
GmFT5b-XbaI-F-Fu28	ATGCTCTAGAATGGCACGGGAGAACCCTCT	Vector construction
GmFT5b-BamHI-R-Fu28	CCAGGGATCCTTAATATCTCCTTCCACCGC	Vector construction
GmCLV3-1-XbaI-F-Fu28	CGGTCTAGAATGGCGTCAAAGTTTATC	Vector construction
GmCLV3-1-SphI-R-Fu28	CGGGCATGCAGGGGTTTGAGGCTTTTTGG	Vector construction
GmWUS1-XbaI-F-Fu28	CGGTCTAGAATGATGGAACCTCAACAAC	Vector construction
GmWUS1-SphI-R-Fu28	CGGGCATGCAGCATAATCTGGAGACCTGC	Vector construction
GmFDL9-HindIII-F-Fu28	ATGCAAGCTTATGGCCTCATGGCCACCCAA	Vector construction
GmFDL9-BamHI-R-Fu28	CCAGGGATCCTCAAAATGGAGATGATGAGG	Vector construction
GmFDL16-HindIII-F-Fu28	ATGCAAGCTTATGGTGGTGCCTGAGTCTCA	Vector construction
GmFDL16-BamHI-R-Fu28	CCAGGGATCCTCATAAAGGGCAACTTAGGG	Vector construction
Cas9-GmFT5b-T1-F	GATTTCACACCCCCAATAACAAGA	Vector construction
Cas9-GmFT5b-T1-R	AAACTCTTGTTATTGGGGGTGTGA	Vector construction
Cas9-GmFT5b-T2-F	ATTAGAGCCCGAACCCTTCAGCA	Vector construction
Cas9-GmFT5b-T2-R	AACTGCTGAAGGGTTCGGGCTCT	Vector construction
Cas9-GmFDL23-T1-F	ATTGGTGATGCTAACATGCAGCA	Vector construction
Cas9-GmFDL23-T1-R	AACTTGTATAATCTGACCCTTGA	Vector construction
Cas9-GmFDL23-T2-F	GATTTATTGTGGTGGAGAAAACTG	Vector construction
Cas9-GmFDL23-T2-R	AAACCAGTTTTCTCCACCACAATA	Vector construction
Cas9-GmCLV3-1-T1-F	GATTAAGCATAAGTAAAACCACAG	Vector construction
Cas9-GmCLV3-1-T1-R	AAACCTGTGGTTTTACTTATGCTT	Vector construction
Cas9-GmCLV3-1-T2-F	ATTTTGACACCATTATGATGCAG	Vector construction
Cas9-GmCLV3-1-T2-R	AACCTGCATCATAATGGTGTCAA	Vector construction
Cas9-GmWUS1-T1-F	GATTATAACTATGATGGAAACGGC	Vector construction
Cas9-GmWUS1-T1-R	AAACGCCGTTTCCATCATAGTTAT	Vector construction
Cas9-GmWUS1-T2-F	ATTAGAGATGTTACAATACTTGG	Vector construction
Cas9-GmWUS1-T2-R	AACCCAAGTATTGTAACATCTCT	Vector construction
AD-GmFDL23-F	GGAGGCCAGTGAATTCATGGGATCTCAAGGTGGGGC	Y2H
AD-GmFDL23-R	CGAGCTCGATGGATCCTCAAAAGATGGCTGAACTAG	Y2H
AD-GmFDL20-F	GGAGGCCAGTGAATTCATGGCAGAGGTTGTGGCA	Y2H
AD-GmFDL20-R	CGAGCTCGATGGATCCTCACCATTGGGATGAATTC	Y2H
BD-GmFT5b-F	CATGGAGGCCGAATTCATGGCACGGGAGAACCCTCT	Y2H
BD-GmFT5b-R	GCAGGTCGACGGATCCTTAATATCTCCTTCCACCGC	Y2H
GmCLV3-1-ChIP-P1-F	CCAGACTTCCACATTTCTAAT	ChIP-qPCR
GmCLV3-1-ChIP-P1-R	GCATGAAGGGATTTGTTTC	ChIP-qPCR
GmCLV3-1-ChIP-P2-F	GAATCACAAGGGAGACAT	ChIP-qPCR
GmCLV3-1-ChIP-P2-R	CATATATGCACATGAACTTT	ChIP-qPCR
GmCLV3-1-ChIP-P3-F	TATAACACGGTTGGCTAA	ChIP-qPCR
GmCLV3-1-ChIP-P3-R	GTGGGATGGTATAATAAGTAAA	ChIP-qPCR
GmCLV3-1-ChIP-P4-F	TGAGCCATCATTCAAATCC	ChIP-qPCR
GmCLV3-1-ChIP-P4-R	CAAGGTGGTGAACAAGTAAT	ChIP-qPCR
GmWUS1-ChIP-P1-F	TGAATTGAGTTATGGATAGT	ChIP-qPCR
GmWUS1-ChIP-P1-R	CTTGAAAGTGAGTGAGAT	ChIP-qPCR
GmWUS1-ChIP-P2-F	ACGAAGAAAGTAACATACA	ChIP-qPCR
GmWUS1-ChIP-P2-R	TGTGGATATATACGTCAAAT	ChIP-qPCR
GmWUS1-ChIP-P3-F	ATATTGACATAGGAAGCTAGAGA	ChIP-qPCR
GmWUS1-ChIP-P3-R	GTTAATGTTTCTTCTCAAACTCTG	ChIP-qPCR
GmFT5b-Cas9-F	TAAAGAATCGACCAATCG	mutant identification
GmFT5b-Cas9-R	TAATATCTCCTTCCACCG	mutant identification
GmFDL23-Cas9-F	TTAGGGTGTATTCTGTCCC	mutant identification
GmFDL23-Cas9-R	TATTGTGGTGGAGAAAACTG	mutant identification
GmCLV3-1-Cas9-F	AATCATACCACTATAAATACG	mutant identification
GmCLV3-1-Cas9-R	AAAGGAGCAGAACACATC	mutant identification
GmWUS1-Cas9-F	GCTAGGCTGAGGCAGTACGG	mutant identification
GmWUS1-Cas9-R	GTCAGGTAGGGAAAGGCTC	mutant identification
